# Supplementary material for: Functionally significant polymorphisms of the MMP-9 gene are associated with peptic ulcer disease in the Caucasian population of Central Russia
Source: Sci Rep. 2021 Jun 29;11:13515. doi: 10.1038/s41598-021-92527-y (PMC8241834; doi:10.1038/s41598-021-92527-y)
Supplement: Supplementary file 3 — Supplementary Information 3. [file 41598_2021_92527_MOESM3_ESM.xlsx]

## Sheet: Лист1
Supplementary Table 2. Non-synonymous PUD-associated SNPs of the MMP-9 gene
(predictive potential were analyzed using the SIFT tool, https://sift.bii.a-star.edu.sg/)
SNP	Ref allele	Alt allele	Amino acid change	SIFT scope	SIFT prediction
rs17576	A	C	Gln279Arg	0.29	tolerated
rs2250889	G	C	Arg574Pro	1.00	tolerated
rs17577	G	A	Arg668Gln	0.02	deleterious
