# Supplementary material for: Functionally significant polymorphisms of the MMP-9 gene are associated with peptic ulcer disease in the Caucasian population of Central Russia
Source: Sci Rep. 2021 Jun 29;11:13515. doi: 10.1038/s41598-021-92527-y (PMC8241834; doi:10.1038/s41598-021-92527-y)
Supplement: Supplementary file 5 — Supplementary Information 5. [file 41598_2021_92527_MOESM5_ESM.xlsx]

## Sheet: Лист1
Supplementary table 4
eQTL values of the PUD-associated SNPs of the MMP-9 gene
(according to Genotype-Tissue Expression (GTEx) (http://www.gtexportal.org/)) ( р <8.0E5, FDR≤0.05)
SNP	Gene Symbol	Variant Id	P-Value	NES	Tissue
rs3918249	SLC12A5	chr20_46009497_T_C_b38	5.5e-14	-0.52	Adrenal Gland
	PLTP	chr20_46009497_T_C_b38	1.5e-12	-0.25	Lung
	PLTP	chr20_46009497_T_C_b38	1.3e-11	-0.28	Colon - Sigmoid
	NEURL2	chr20_46009497_T_C_b38	4.3e-11	-0.26	Adipose - Subcutaneous
	MMP9	chr20_46009497_T_C_b38	6.5e-10	-0.23	Cells - Cultured fibroblasts
	PLTP	chr20_46009497_T_C_b38	1.2e-9	-0.17	Adipose - Subcutaneous
	RP3-337O18.9	chr20_46009497_T_C_b38	1.2e-8	-0.21	Adipose - Subcutaneous
	NEURL2	chr20_46009497_T_C_b38	1.4e-8	-0.24	Adipose - Visceral (Omentum)
	ZSWIM1	chr20_46009497_T_C_b38	1.8e-8	-0.24	Adipose - Visceral (Omentum)
	ZNF335	chr20_46009497_T_C_b38	2.6e-8	0.12	Skin - Not Sun Exposed (Suprapubic)
	PLTP	chr20_46009497_T_C_b38	5.3e-8	-0.18	Nerve - Tibial
	PLTP	chr20_46009497_T_C_b38	1.5e-7	-0.15	Artery - Tibial
	PLTP	chr20_46009497_T_C_b38	1.6e-7	-0.15	Adipose - Visceral (Omentum)
	RP3-337O18.9	chr20_46009497_T_C_b38	2.3e-7	-0.22	Lung
	ZNF335	chr20_46009497_T_C_b38	2.8e-7	0.098	Whole Blood
	PLTP	chr20_46009497_T_C_b38	2.9e-7	-0.16	Thyroid
	MMP9	chr20_46009497_T_C_b38	3.4e-7	0.26	Skin - Not Sun Exposed (Suprapubic)
	RP11-465L10.10	chr20_46009497_T_C_b38	4.1e-7	-0.41	Adrenal Gland
	SPATA25	chr20_46009497_T_C_b38	5.6e-7	-0.25	Adipose - Visceral (Omentum)
	PLTP	chr20_46009497_T_C_b38	5.7e-7	-0.21	Heart - Left Ventricle
	RP3-337O18.9	chr20_46009497_T_C_b38	6.3e-7	-0.22	Adipose - Visceral (Omentum)
	NEURL2	chr20_46009497_T_C_b38	0.0000011	-0.22	Lung
	PLTP	chr20_46009497_T_C_b38	0.0000016	-0.17	Colon - Transverse
	PLTP	chr20_46009497_T_C_b38	0.0000023	-0.12	Muscle - Skeletal
	RP3-337O18.9	chr20_46009497_T_C_b38	0.0000035	-0.28	Colon - Sigmoid
	NEURL2	chr20_46009497_T_C_b38	0.0000036	-0.20	Thyroid
	PCIF1	chr20_46009497_T_C_b38	0.0000056	0.31	Adrenal Gland
	PLTP	chr20_46009497_T_C_b38	0.000012	-0.22	Pituitary
	CD40	chr20_46009497_T_C_b38	0.000013	0.19	Adipose - Visceral (Omentum)
	PLTP	chr20_46009497_T_C_b38	0.000016	-0.19	Heart - Atrial Appendage
	CD40	chr20_46009497_T_C_b38	0.000026	0.15	Skin - Sun Exposed (Lower leg)
	DNTTIP1	chr20_46009497_T_C_b38	0.000029	-0.14	Spleen
	MMP9	chr20_46009497_T_C_b38	0.000031	0.26	Testis
	DNTTIP1	chr20_46009497_T_C_b38	0.000041	-0.12	Artery - Tibial
	NEURL2	chr20_46009497_T_C_b38	0.000049	-0.22	Colon - Transverse
	PLTP	chr20_46009497_T_C_b38	0.000049	-0.15	Artery - Aorta
	CD40	chr20_46009497_T_C_b38	0.000057	0.15	Adipose - Subcutaneous
	PLTP	chr20_46009497_T_C_b38	0.000062	-0.13	Esophagus - Muscularis
	WFDC3	chr20_46009497_T_C_b38	0.000062	-0.18	Artery - Tibial
	RP3-337O18.9	chr20_46009497_T_C_b38	0.000083	-0.24	Heart - Atrial Appendage
	DNTTIP1	chr20_46009497_T_C_b38	0.00012	-0.049	Whole Blood
	SNX21	chr20_46009497_T_C_b38	0.00014	0.10	Muscle - Skeletal
	WFDC10B	chr20_46009497_T_C_b38	0.00019	0.14	Skin - Sun Exposed (Lower leg)
	SPATA25	chr20_46009497_T_C_b38	0.00020	-0.19	Nerve - Tibial
rs17576	PLTP	chr20_46011586_A_G_b38	1.5e-14	-0.27	Lung
	SLC12A5	chr20_46011586_A_G_b38	7.3e-12	-0.49	Adrenal Gland
	NEURL2	chr20_46011586_A_G_b38	7.3e-11	-0.26	Adipose - Subcutaneous
	PLTP	chr20_46011586_A_G_b38	1.9e-10	-0.28	Colon - Sigmoid
	PLTP	chr20_46011586_A_G_b38	3.8e-10	-0.17	Adipose - Subcutaneous
	RP3-337O18.9	chr20_46011586_A_G_b38	1.1e-9	-0.23	Adipose - Subcutaneous
	NEURL2	chr20_46011586_A_G_b38	2.2e-9	-0.25	Adipose - Visceral (Omentum)
	PLTP	chr20_46011586_A_G_b38	3.1e-9	-0.20	Nerve - Tibial
	ZSWIM1	chr20_46011586_A_G_b38	3.4e-9	-0.26	Adipose - Visceral (Omentum)
	PLTP	chr20_46011586_A_G_b38	3.8e-9	-0.17	Adipose - Visceral (Omentum)
	PLTP	chr20_46011586_A_G_b38	8.9e-9	-0.16	Artery - Tibial
	MMP9	chr20_46011586_A_G_b38	1.9e-8	-0.22	Cells - Cultured fibroblasts
	RP3-337O18.9	chr20_46011586_A_G_b38	4.7e-8	-0.24	Adipose - Visceral (Omentum)
	PLTP	chr20_46011586_A_G_b38	5.0e-8	-0.17	Thyroid
	RP3-337O18.9	chr20_46011586_A_G_b38	6.9e-8	-0.23	Lung
	SPATA25	chr20_46011586_A_G_b38	8.2e-8	-0.26	Adipose - Visceral (Omentum)
	NEURL2	chr20_46011586_A_G_b38	9.2e-8	-0.24	Lung
	PLTP	chr20_46011586_A_G_b38	1.0e-7	-0.22	Heart - Left Ventricle
	PLTP	chr20_46011586_A_G_b38	1.3e-7	-0.13	Muscle - Skeletal
	NEURL2	chr20_46011586_A_G_b38	2.1e-7	-0.22	Thyroid
	RP11-465L10.10	chr20_46011586_A_G_b38	4.1e-7	-0.42	Adrenal Gland
	PLTP	chr20_46011586_A_G_b38	5.6e-7	-0.18	Colon - Transverse
	ZNF335	chr20_46011586_A_G_b38	7.7e-7	0.11	Skin - Not Sun Exposed (Suprapubic)
	PLTP	chr20_46011586_A_G_b38	0.0000019	-0.18	Artery - Aorta
	PLTP	chr20_46011586_A_G_b38	0.0000025	-0.21	Heart - Atrial Appendage
	PLTP	chr20_46011586_A_G_b38	0.0000027	-0.15	Esophagus - Muscularis
	PLTP	chr20_46011586_A_G_b38	0.0000030	-0.25	Adrenal Gland
	RP3-337O18.9	chr20_46011586_A_G_b38	0.0000058	-0.28	Colon - Sigmoid
	ZNF335	chr20_46011586_A_G_b38	0.0000062	0.088	Whole Blood
	PCIF1	chr20_46011586_A_G_b38	0.0000076	0.31	Adrenal Gland
	PLTP	chr20_46011586_A_G_b38	0.0000089	-0.22	Pituitary
	NEURL2	chr20_46011586_A_G_b38	0.000013	-0.23	Colon - Transverse
	RP3-337O18.9	chr20_46011586_A_G_b38	0.000018	-0.26	Heart - Atrial Appendage
	NEURL2	chr20_46011586_A_G_b38	0.000018	-0.25	Esophagus - Gastroesophageal Junction
	SLC12A5	chr20_46011586_A_G_b38	0.000023	0.19	Lung
	NEURL2	chr20_46011586_A_G_b38	0.000035	-0.22	Artery - Aorta
	MMP9	chr20_46011586_A_G_b38	0.000036	0.21	Skin - Not Sun Exposed (Suprapubic)
	CD40	chr20_46011586_A_G_b38	0.000041	0.15	Skin - Sun Exposed (Lower leg)
	NEURL2	chr20_46011586_A_G_b38	0.000052	-0.18	Skin - Sun Exposed (Lower leg)
	CD40	chr20_46011586_A_G_b38	0.000069	0.17	Adipose - Visceral (Omentum)
	RP3-337O18.9	chr20_46011586_A_G_b38	0.000074	-0.23	Esophagus - Gastroesophageal Junction
	WFDC3	chr20_46011586_A_G_b38	0.000099	-0.18	Artery - Tibial
	CD40	chr20_46011586_A_G_b38	0.000099	0.14	Adipose - Subcutaneous
	DNTTIP1	chr20_46011586_A_G_b38	0.00012	-0.12	Artery - Tibial
	RP3-337O18.9	chr20_46011586_A_G_b38	0.00013	-0.18	Nerve - Tibial
	SLC12A5	chr20_46011586_A_G_b38	0.00014	0.20	Adipose - Subcutaneous
rs3787268	NEURL2	chr20_46013092_G_A_b38	5.9e-11	-0.31	Adipose - Subcutaneous
	NEURL2	chr20_46013092_G_A_b38	5.0e-9	-0.32	Adipose - Visceral (Omentum)
	RP3-337O18.9	chr20_46013092_G_A_b38	1.1e-8	-0.32	Adipose - Visceral (Omentum)
	SLC12A5	chr20_46013092_G_A_b38	1.2e-7	-0.40	Adipose - Visceral (Omentum)
	SPATA25	chr20_46013092_G_A_b38	1.5e-7	-0.33	Adipose - Visceral (Omentum)
	RP3-337O18.9	chr20_46013092_G_A_b38	1.8e-7	-0.23	Adipose - Subcutaneous
	ZNF335	chr20_46013092_G_A_b38	4.5e-7	0.12	Whole Blood
	PLTP	chr20_46013092_G_A_b38	5.0e-7	-0.22	Lung
	ZSWIM1	chr20_46013092_G_A_b38	6.6e-7	-0.28	Adipose - Visceral (Omentum)
	PLTP	chr20_46013092_G_A_b38	0.0000020	-0.20	Nerve - Tibial
	PLTP	chr20_46013092_G_A_b38	0.0000022	-0.31	Adrenal Gland
	RP3-337O18.9	chr20_46013092_G_A_b38	0.0000035	-0.24	Lung
	RP3-337O18.9	chr20_46013092_G_A_b38	0.000014	-0.50	Vagina
	NEURL2	chr20_46013092_G_A_b38	0.000017	-0.23	Esophagus - Muscularis
	SLC12A5	chr20_46013092_G_A_b38	0.000020	-0.26	Adipose - Subcutaneous
	PLTP	chr20_46013092_G_A_b38	0.000021	-0.14	Adipose - Subcutaneous
	CD40	chr20_46013092_G_A_b38	0.000022	0.18	Adipose - Subcutaneous
	NEURL2	chr20_46013092_G_A_b38	0.000030	-0.22	Lung
	PLTP	chr20_46013092_G_A_b38	0.000036	-0.14	Brain - Frontal Cortex (BA9)
	PLTP	chr20_46013092_G_A_b38	0.000075	-0.22	Colon - Sigmoid
	PLTP	chr20_46013092_G_A_b38	0.000076	-0.17	Artery - Aorta
	CD40	chr20_46013092_G_A_b38	0.000098	0.17	Skin - Sun Exposed (Lower leg)
	ZNF335	chr20_46013092_G_A_b38	0.00015	0.10	Skin - Not Sun Exposed (Suprapubic)
rs2250889	PLTP	chr20_46013767_G_C_b38	7.5e-13	0.49	Esophagus - Mucosa
	PLTP	chr20_46013767_G_C_b38	6.2e-11	0.42	Skin - Sun Exposed (Lower leg)
	PLTP	chr20_46013767_G_C_b38	6.8e-10	0.45	Skin - Not Sun Exposed (Suprapubic)
	PCIF1	chr20_46013767_G_C_b38	0.000065	-0.12	Whole Blood
	NEURL2	chr20_46013767_G_C_b38	0.00012	0.35	Nerve - Tibial
rs17577	SLC12A5	chr20_46014472_G_A_b38	2.1e-30	0.69	Lung
	SLC12A5	chr20_46014472_G_A_b38	5.9e-30	0.79	Adipose - Subcutaneous
	SLC12A5	chr20_46014472_G_A_b38	8.0e-24	0.76	Adipose - Visceral (Omentum)
	SLC12A5	chr20_46014472_G_A_b38	4.2e-16	0.75	Breast - Mammary Tissue
	SLC12A5	chr20_46014472_G_A_b38	5.7e-12	0.75	Spleen
	SLC12A5	chr20_46014472_G_A_b38	1.9e-11	0.68	Artery - Aorta
	SLC12A5	chr20_46014472_G_A_b38	5.9e-11	0.79	Artery - Coronary
	SLC12A5	chr20_46014472_G_A_b38	1.8e-10	0.48	Thyroid
	SLC12A5	chr20_46014472_G_A_b38	3.4e-9	0.46	Nerve - Tibial
	SLC12A5	chr20_46014472_G_A_b38	3.1e-8	0.41	Skin - Sun Exposed (Lower leg)
	PLTP	chr20_46014472_G_A_b38	2.6e-7	-0.31	Heart - Atrial Appendage
	SLC12A5	chr20_46014472_G_A_b38	3.3e-7	0.38	Artery - Tibial
	SLC12A5	chr20_46014472_G_A_b38	7.2e-7	0.45	Colon - Transverse
	SLC12A5	chr20_46014472_G_A_b38	0.0000011	0.43	Esophagus - Muscularis
	SLC12A5	chr20_46014472_G_A_b38	0.0000062	0.39	Skin - Not Sun Exposed (Suprapubic)
	SLC12A5	chr20_46014472_G_A_b38	0.0000064	0.86	Uterus
	PLTP	chr20_46014472_G_A_b38	0.000011	-0.23	Lung
	SLC12A5	chr20_46014472_G_A_b38	0.000011	0.63	Small Intestine - Terminal Ileum
	SYS1	chr20_46014472_G_A_b38	0.000034	-0.13	Whole Blood
	SNX21	chr20_46014472_G_A_b38	0.000046	0.15	Muscle - Skeletal
	RPL13P2	chr20_46014472_G_A_b38	0.000057	-0.42	Testis
	DNTTIP1	chr20_46014472_G_A_b38	0.000060	-0.17	Artery - Tibial
	PLTP	chr20_46014472_G_A_b38	0.000062	-0.18	Esophagus - Muscularis
	MMP9	chr20_46014472_G_A_b38	0.000080	0.35	Testis
	RP11-465L10.10	chr20_46014472_G_A_b38	0.00013	-0.27	Skin - Not Sun Exposed (Suprapubic)
