# Supplementary material for: Functionally significant polymorphisms of the MMP-9 gene are associated with peptic ulcer disease in the Caucasian population of Central Russia
Source: Sci Rep. 2021 Jun 29;11:13515. doi: 10.1038/s41598-021-92527-y (PMC8241834; doi:10.1038/s41598-021-92527-y)
Supplement: Supplementary file 6 — Supplementary Information 6. [file 41598_2021_92527_MOESM6_ESM.xlsx]

## Sheet: Лист1
Supplementary table 5
Effect of SNPs in high LD (r2≥0.80) with the PUD-associated polymorphisms of the MMP-9 gene on gene expression level
(according to Genotype-Tissue Expression (GTEx) (http://www.gtexportal.org/)) ( р <8.0E5, FDR≤0.05)
Lead SNP	Position lead SNP(hg38)	Proxy SNP	Position proxy SNP (hg38)	Distance (bp) between proxy and lead SNP	r2 between lead and proxy	D between lead and proxy	Gene Symbol	p	Effect Size (β)	Tissue
rs3918249	46009497	rs6017721	45987758	21739	0.83	0.94	SLC12A5	0.00000000085	-0.48	Adrenal Gland
							NEURL2	0.0000000018	-0.28	Adipose - Subcutaneous
							NEURL2	0.000000097	-0.3	Adipose - Visceral (Omentum)
							ZSWIM1	0.00000023	-0.28	Adipose - Visceral (Omentum)
							PLTP	0.00000072	-0.19	Lung
							RP3-337O18.9	0.00000072	-0.22	Adipose - Subcutaneous
							PLTP	0.000001	-0.18	Artery - Tibial
							PLTP	0.0000015	-0.2	Nerve - Tibial
							PLTP	0.0000023	-0.25	Heart - Left Ventricle
							PCIF1	0.0000051	0.32	Adrenal Gland
							SPATA25	0.0000078	-0.28	Adipose - Visceral (Omentum)
							PLTP	0.0000079	-0.27	Colon - Sigmoid
							WFDC3	0.0000087	-0.25	Artery - Tibial
							PLTP	0.0000095	-0.17	Thyroid
							CD40	0.000011	0.25	Adipose - Visceral (Omentum)
							PLTP	0.000012	-0.16	Adipose - Subcutaneous
							PLTP	0.000013	-0.16	Adipose - Visceral (Omentum)
							SNX21	0.000029	0.13	Muscle - Skeletal
							ZNF335	0.000033	0.1	Whole Blood
							MMP9	0.000045	-0.2	Cells - Transformed fibroblasts
rs3918249	46009497	rs3848721	46005037	4460	0.94	0.99	SLC12A5	0.0000000000045	-0.53	Adrenal Gland
							PLTP	0.000000026	-0.23	Lung
							PLTP	0.000000038	-0.23	Nerve - Tibial
							PLTP	0.00000025	-0.19	Artery - Tibial
							NEURL2	0.00000069	-0.24	Adipose - Subcutaneous
							PCIF1	0.00000087	0.35	Adrenal Gland
							NEURL2	0.0000019	-0.27	Adipose - Visceral (Omentum)
							PLTP	0.0000025	-0.27	Heart - Left Ventricle
							SNX21	0.0000027	0.15	Muscle - Skeletal
							PLTP	0.0000048	-0.25	Brain - Hippocampus
							WFDC3	0.0000083	-0.25	Artery - Tibial
							PLTP	0.0000083	-0.31	Adrenal Gland
							PLTP	0.000012	-0.17	Thyroid
							PLTP	0.000014	-0.23	Artery - Aorta
							WFDC10B	0.000014	0.39	Testis
							PLTP	0.000016	-0.16	Adipose - Subcutaneous
							RP3-337O18.9	0.000021	-0.2	Adipose - Subcutaneous
							ZSWIM1	0.000025	-0.24	Adipose - Visceral (Omentum)
							WFDC3	0.00003	-0.32	Testis
							NEURL2	0.000032	-0.22	Thyroid
							ZNF335	0.000033	0.1	Whole Blood
							WFDC3	0.000054	-0.25	Adipose - Subcutaneous
rs3918249	46009497	rs3848722	46005181	4316	0.94	0.99	SLC12A5	0.000000000031	-0.51	Adrenal Gland
							NEURL2	0.000000013	-0.32	Adipose - Visceral (Omentum)
							NEURL2	0.000000052	-0.26	Adipose - Subcutaneous
							ZSWIM1	0.00000019	-0.29	Adipose - Visceral (Omentum)
							PLTP	0.0000004	-0.21	Nerve - Tibial
							PCIF1	0.00000079	0.34	Adrenal Gland
							PLTP	0.00000089	-0.2	Lung
							PLTP	0.0000014	-0.18	Artery - Tibial
							RP3-337O18.9	0.0000016	-0.22	Adipose - Subcutaneous
							SNX21	0.0000016	0.15	Muscle - Skeletal
							PLTP	0.0000038	-0.17	Adipose - Visceral (Omentum)
							CD40	0.0000038	0.27	Adipose - Visceral (Omentum)
							PLTP	0.0000096	-0.24	Brain - Hippocampus
							PLTP	0.00001	-0.24	Heart - Left Ventricle
							PLTP	0.000012	-0.27	Colon - Sigmoid
							SPATA25	0.000013	-0.28	Adipose - Visceral (Omentum)
							PLTP	0.000014	-0.16	Adipose - Subcutaneous
							RP3-337O18.9	0.000019	-0.24	Adipose - Visceral (Omentum)
							ZNF335	0.000034	0.1	Whole Blood
							WFDC3	0.000036	-0.23	Artery - Tibial
							WFDC10B	0.00004	0.36	Testis
							MMP9	0.000045	-0.21	Cells - Transformed fibroblasts
							PLTP	0.000063	-0.16	Thyroid
rs3918249	46009497	rs4810482	46005911	3586	0.9	0.96	SLC12A5	0.00000000031	-0.49	Adrenal Gland
							NEURL2	0.000000018	-0.32	Adipose - Visceral (Omentum)
							NEURL2	0.00000012	-0.26	Adipose - Subcutaneous
							ZSWIM1	0.00000038	-0.29	Adipose - Visceral (Omentum)
							RP3-337O18.9	0.00000049	-0.23	Adipose - Subcutaneous
							PLTP	0.00000064	-0.21	Nerve - Tibial
							PLTP	0.0000013	-0.19	Lung
							PCIF1	0.0000014	0.34	Adrenal Gland
							SNX21	0.0000017	0.15	Muscle - Skeletal
							PLTP	0.0000023	-0.17	Artery - Tibial
							PLTP	0.0000043	-0.17	Adipose - Subcutaneous
							PLTP	0.0000053	-0.17	Adipose - Visceral (Omentum)
							PLTP	0.0000063	-0.28	Colon - Sigmoid
							WFDC3	0.0000066	-0.26	Artery - Tibial
							SPATA25	0.0000077	-0.29	Adipose - Visceral (Omentum)
							PLTP	0.0000079	-0.32	Pituitary
							CD40	0.000022	0.25	Adipose - Visceral (Omentum)
							WFDC10B	0.000031	0.37	Testis
							NEURL2	0.000033	-0.27	Artery - Aorta
							RP3-337O18.9	0.000034	-0.23	Adipose - Visceral (Omentum)
							PLTP	0.000035	-0.16	Thyroid
							WFDC3	0.000037	-0.31	Testis
							MMP9	0.000042	-0.21	Cells - Transformed fibroblasts
rs3918249	46009497	rs3761158	46006273	3224	0.85	0.99	SLC12A5	0.00000000032	-0.48	Adrenal Gland
							NEURL2	0.000000016	-0.27	Adipose - Subcutaneous
							PLTP	0.00000026	-0.2	Lung
							ZSWIM1	0.00000031	-0.28	Adipose - Visceral (Omentum)
							NEURL2	0.00000054	-0.28	Adipose - Visceral (Omentum)
							PLTP	0.00000075	-0.18	Artery - Tibial
							PLTP	0.00000083	-0.27	Heart - Left Ventricle
							RP3-337O18.9	0.0000014	-0.22	Adipose - Subcutaneous
							PLTP	0.0000021	-0.2	Nerve - Tibial
							SPATA25	0.0000036	-0.29	Adipose - Visceral (Omentum)
							PLTP	0.0000037	-0.28	Colon - Sigmoid
							PLTP	0.0000038	-0.18	Thyroid
							PCIF1	0.0000094	0.31	Adrenal Gland
							CD40	0.000013	0.25	Adipose - Visceral (Omentum)
							PLTP	0.000013	-0.16	Adipose - Subcutaneous
							PLTP	0.000015	-0.15	Adipose - Visceral (Omentum)
							PLTP	0.00002	-0.29	Pituitary
							SNX21	0.000024	0.13	Muscle - Skeletal
							WFDC10B	0.000025	0.36	Testis
							MMP9	0.00003	-0.21	Cells - Transformed fibroblasts
							WFDC3	0.000031	-0.23	Artery - Tibial
rs3918249	46009497	rs3761159	46006318	3179	0.95	0.99	SLC12A5	0.00000000004	-0.52	Adrenal Gland
							PLTP	0.00000001	-0.24	Lung
							PLTP	0.000000061	-0.23	Nerve - Tibial
							PLTP	0.00000032	-0.19	Artery - Tibial
							PCIF1	0.00000099	0.35	Adrenal Gland
							NEURL2	0.0000014	-0.28	Adipose - Visceral (Omentum)
							PLTP	0.0000025	-0.27	Heart - Left Ventricle
							NEURL2	0.0000026	-0.23	Adipose - Subcutaneous
							SNX21	0.0000034	0.15	Muscle - Skeletal
							PLTP	0.0000035	-0.22	Brain - Frontal Cortex (BA9)
							PLTP	0.0000046	-0.17	Adipose - Subcutaneous
							PLTP	0.0000064	-0.25	Brain - Hippocampus
							WFDC3	0.0000064	-0.26	Artery - Tibial
							PLTP	0.000012	-0.17	Thyroid
							PLTP	0.000014	-0.23	Artery - Aorta
							WFDC10B	0.000014	0.39	Testis
							PLTP	0.000019	-0.3	Adrenal Gland
							ZSWIM1	0.000022	-0.24	Adipose - Visceral (Omentum)
							PLTP	0.000026	-0.16	Adipose - Visceral (Omentum)
							NEURL2	0.000029	-0.22	Thyroid
							WFDC3	0.00003	-0.32	Testis
							RP3-337O18.9	0.000033	-0.2	Adipose - Subcutaneous
							NEURL2	0.000043	-0.21	Lung
rs3918249	46009497	rs6065913	46006464	3033	0.99	0.99	SLC12A5	0.00000000000061	-0.57	Adrenal Gland
							PLTP	0.00000000013	-0.26	Lung
							PLTP	0.000000048	-0.24	Nerve - Tibial
							PLTP	0.00000028	-0.29	Heart - Left Ventricle
							PLTP	0.0000003	-0.19	Adipose - Subcutaneous
							PLTP	0.00000052	-0.19	Artery - Tibial
							NEURL2	0.0000014	-0.24	Adipose - Subcutaneous
							PLTP	0.0000016	-0.19	Thyroid
							PLTP	0.0000016	-0.23	Brain - Frontal Cortex (BA9)
							NEURL2	0.0000019	-0.28	Adipose - Visceral (Omentum)
							PLTP	0.000002	-0.25	Artery - Aorta
							PLTP	0.0000032	-0.26	Brain - Hippocampus
							NEURL2	0.0000046	-0.24	Lung
							PLTP	0.0000047	-0.29	Colon - Sigmoid
							PCIF1	0.0000073	0.33	Adrenal Gland
							NEURL2	0.0000092	-0.29	Artery - Aorta
							RP3-337O18.9	0.0000099	-0.21	Lung
							PLTP	0.000013	-0.31	Adrenal Gland
							ZSWIM1	0.000017	-0.25	Adipose - Visceral (Omentum)
							SNX21	0.00002	0.13	Muscle - Skeletal
							PLTP	0.000021	-0.16	Adipose - Visceral (Omentum)
							NEURL2	0.000022	-0.23	Thyroid
							ZNF335	0.000025	0.1	Whole Blood
							RP3-337O18.9	0.000027	-0.2	Adipose - Subcutaneous
rs3918249	46009497	rs3918240	46006977	2520	0.99	0.99	SLC12A5	0.00000000000061	-0.57	Adrenal Gland
							PLTP	0.00000000013	-0.26	Lung
							PLTP	0.000000048	-0.24	Nerve - Tibial
							PLTP	0.00000028	-0.29	Heart - Left Ventricle
							PLTP	0.0000003	-0.19	Adipose - Subcutaneous
							PLTP	0.00000052	-0.19	Artery - Tibial
							NEURL2	0.0000014	-0.24	Adipose - Subcutaneous
							PLTP	0.0000016	-0.19	Thyroid
							PLTP	0.0000016	-0.23	Brain - Frontal Cortex (BA9)
							NEURL2	0.0000019	-0.28	Adipose - Visceral (Omentum)
							PLTP	0.000002	-0.25	Artery - Aorta
							PLTP	0.0000032	-0.26	Brain - Hippocampus
							NEURL2	0.0000046	-0.24	Lung
							PLTP	0.0000047	-0.29	Colon - Sigmoid
							PCIF1	0.0000073	0.33	Adrenal Gland
							NEURL2	0.0000092	-0.29	Artery - Aorta
							RP3-337O18.9	0.0000099	-0.21	Lung
							PLTP	0.000013	-0.31	Adrenal Gland
							ZSWIM1	0.000017	-0.25	Adipose - Visceral (Omentum)
							SNX21	0.00002	0.13	Muscle - Skeletal
							PLTP	0.000021	-0.16	Adipose - Visceral (Omentum)
							NEURL2	0.000022	-0.23	Thyroid
							ZNF335	0.000025	0.1	Whole Blood
							RP3-337O18.9	0.000027	-0.2	Adipose - Subcutaneous
rs3918249	46009497	rs3918251	46010142	-645	0.83	0.92	PLTP	0.0000000076	-0.24	Lung
							SLC12A5	0.0000000082	-0.48	Adrenal Gland
							PLTP	0.00000003	-0.2	Artery - Tibial
							PLTP	0.000000057	-0.23	Nerve - Tibial
							NEURL2	0.0000015	-0.27	Adipose - Visceral (Omentum)
							PLTP	0.0000015	-0.17	Adipose - Visceral (Omentum)
							PLTP	0.0000018	-0.26	Heart - Left Ventricle
							PCIF1	0.0000021	0.35	Adrenal Gland
							NEURL2	0.0000022	-0.23	Adipose - Subcutaneous
							PLTP	0.000004	-0.24	Artery - Aorta
							PLTP	0.0000059	-0.17	Adipose - Subcutaneous
							PLTP	0.0000066	-0.24	Brain - Hippocampus
							NEURL2	0.00001	-0.29	Artery - Aorta
							ZSWIM1	0.000012	-0.25	Adipose - Visceral (Omentum)
							RP3-337O18.9	0.000012	-0.21	Lung
							PLTP	0.000019	-0.27	Colon - Sigmoid
							PLTP	0.00002	-0.31	Pituitary
							WFDC3	0.000024	-0.24	Artery - Tibial
							NEURL2	0.000024	-0.22	Lung
							SNX21	0.000028	0.13	Muscle - Skeletal
							RP3-337O18.9	0.00004	-0.19	Adipose - Subcutaneous
							PLTP	0.000041	-0.16	Thyroid
							NEURL2	0.000044	-0.22	Thyroid
rs3918249	46009497	rs17576	46011586	-2089	0.99	0.99	PLTP	1.5e-14	-0.27	Lung
							SLC12A5	7.3e-12	-0.49	Adrenal Gland
							NEURL2	7.3e-11	-0.26	Adipose - Subcutaneous
							PLTP	1.9e-10	-0.28	Colon - Sigmoid
							PLTP	3.8e-10	-0.17	Adipose - Subcutaneous
							RP3-337O18.9	1.1e-9	-0.23	Adipose - Subcutaneous
							NEURL2	2.2e-9	-0.25	Adipose - Visceral (Omentum)
							PLTP	3.1e-9	-0.20	Nerve - Tibial
							ZSWIM1	3.4e-9	-0.26	Adipose - Visceral (Omentum)
							PLTP	3.8e-9	-0.17	Adipose - Visceral (Omentum)
							PLTP	8.9e-9	-0.16	Artery - Tibial
							MMP9	1.9e-8	-0.22	Cells - Cultured fibroblasts
							RP3-337O18.9	4.7e-8	-0.24	Adipose - Visceral (Omentum)
							PLTP	5.0e-8	-0.17	Thyroid
							RP3-337O18.9	6.9e-8	-0.23	Lung
							SPATA25	8.2e-8	-0.26	Adipose - Visceral (Omentum)
							NEURL2	9.2e-8	-0.24	Lung
							PLTP	1.0e-7	-0.22	Heart - Left Ventricle
							PLTP	1.3e-7	-0.13	Muscle - Skeletal
							NEURL2	2.1e-7	-0.22	Thyroid
							RP11-465L10.10	4.1e-7	-0.42	Adrenal Gland
							PLTP	5.6e-7	-0.18	Colon - Transverse
							ZNF335	7.7e-7	0.11	Skin - Not Sun Exposed (Suprapubic)
							PLTP	0.0000019	-0.18	Artery - Aorta
							PLTP	0.0000025	-0.21	Heart - Atrial Appendage
							PLTP	0.0000027	-0.15	Esophagus - Muscularis
							PLTP	0.0000030	-0.25	Adrenal Gland
							RP3-337O18.9	0.0000058	-0.28	Colon - Sigmoid
							ZNF335	0.0000062	0.088	Whole Blood
							PCIF1	0.0000076	0.31	Adrenal Gland
							PLTP	0.0000089	-0.22	Pituitary
							NEURL2	0.000013	-0.23	Colon - Transverse
							RP3-337O18.9	0.000018	-0.26	Heart - Atrial Appendage
							NEURL2	0.000018	-0.25	Esophagus - Gastroesophageal Junction
							SLC12A5	0.000023	0.19	Lung
							NEURL2	0.000035	-0.22	Artery - Aorta
							MMP9	0.000036	0.21	Skin - Not Sun Exposed (Suprapubic)
							CD40	0.000041	0.15	Skin - Sun Exposed (Lower leg)
							NEURL2	0.000052	-0.18	Skin - Sun Exposed (Lower leg)
							CD40	0.000069	0.17	Adipose - Visceral (Omentum)
							RP3-337O18.9	0.000074	-0.23	Esophagus - Gastroesophageal Junction
							WFDC3	0.000099	-0.18	Artery - Tibial
							CD40	0.000099	0.14	Adipose - Subcutaneous
							DNTTIP1	0.00012	-0.12	Artery - Tibial
							RP3-337O18.9	0.00013	-0.18	Nerve - Tibial
							SLC12A5	0.00014	0.20	Adipose - Subcutaneous
rs3918249	46009497	rs13969	46014194	-4697	0.82	-0.98	SLC12A5	0.000000000012	0.5	Adrenal Gland
							PLTP	0.000000000041	0.28	Nerve - Tibial
							NEURL2	0.000000000047	0.35	Adipose - Visceral (Omentum)
							PLTP	0.00000000011	0.23	Artery - Tibial
							PLTP	0.0000000028	0.24	Lung
							NEURL2	0.000000004	0.27	Adipose - Subcutaneous
							PLTP	0.0000000059	0.35	Colon - Sigmoid
							ZSWIM1	0.0000000059	0.31	Adipose - Visceral (Omentum)
							PLTP	0.000000034	0.2	Adipose - Subcutaneous
							RP3-337O18.9	0.000000051	0.29	Adipose - Visceral (Omentum)
							RP3-337O18.9	0.00000013	0.24	Lung
							SPATA25	0.00000014	0.32	Adipose - Visceral (Omentum)
							RP3-337O18.9	0.00000019	0.23	Adipose - Subcutaneous
							PLTP	0.00000023	0.18	Adipose - Visceral (Omentum)
							PLTP	0.00000091	0.25	Artery - Aorta
							SNX21	0.000001	-0.15	Muscle - Skeletal
							CD40	0.0000017	-0.27	Adipose - Visceral (Omentum)
							NEURL2	0.0000044	0.23	Lung
							NEURL2	0.0000055	0.29	Artery - Aorta
							PLTP	0.000013	0.24	Stomach
							PCIF1	0.000013	-0.3	Adrenal Gland
							SNX21	0.000022	0.17	Thyroid
							PLTP	0.000024	0.16	Thyroid
							CD40	0.000047	-0.19	Skin - Sun Exposed (Lower leg)
rs17576	46011586	rs6017721	45987758	23828	0.82	0.94	SLC12A5	0.00000000085	-0.48	Adrenal Gland
							NEURL2	0.0000000018	-0.28	Adipose - Subcutaneous
							NEURL2	0.000000097	-0.3	Adipose - Visceral (Omentum)
							ZSWIM1	0.00000023	-0.28	Adipose - Visceral (Omentum)
							PLTP	0.00000072	-0.19	Lung
							RP3-337O18.9	0.00000072	-0.22	Adipose - Subcutaneous
							PLTP	0.000001	-0.18	Artery - Tibial
							PLTP	0.0000015	-0.2	Nerve - Tibial
							PLTP	0.0000023	-0.25	Heart - Left Ventricle
							PCIF1	0.0000051	0.32	Adrenal Gland
							SPATA25	0.0000078	-0.28	Adipose - Visceral (Omentum)
							PLTP	0.0000079	-0.27	Colon - Sigmoid
							WFDC3	0.0000087	-0.25	Artery - Tibial
							PLTP	0.0000095	-0.17	Thyroid
							CD40	0.000011	0.25	Adipose - Visceral (Omentum)
							PLTP	0.000012	-0.16	Adipose - Subcutaneous
							PLTP	0.000013	-0.16	Adipose - Visceral (Omentum)
							SNX21	0.000029	0.13	Muscle - Skeletal
							ZNF335	0.000033	0.1	Whole Blood
							MMP9	0.000045	-0.2	Cells - Transformed fibroblasts
rs17576	46011586	rs3848721	46005037	6549	0.92	0.99	SLC12A5	0.0000000000045	-0.53	Adrenal Gland
							PLTP	0.000000026	-0.23	Lung
							PLTP	0.000000038	-0.23	Nerve - Tibial
							PLTP	0.00000025	-0.19	Artery - Tibial
							NEURL2	0.00000069	-0.24	Adipose - Subcutaneous
							PCIF1	0.00000087	0.35	Adrenal Gland
							NEURL2	0.0000019	-0.27	Adipose - Visceral (Omentum)
							PLTP	0.0000025	-0.27	Heart - Left Ventricle
							SNX21	0.0000027	0.15	Muscle - Skeletal
							PLTP	0.0000048	-0.25	Brain - Hippocampus
							WFDC3	0.0000083	-0.25	Artery - Tibial
							PLTP	0.0000083	-0.31	Adrenal Gland
							PLTP	0.000012	-0.17	Thyroid
							PLTP	0.000014	-0.23	Artery - Aorta
							WFDC10B	0.000014	0.39	Testis
							PLTP	0.000016	-0.16	Adipose - Subcutaneous
							RP3-337O18.9	0.000021	-0.2	Adipose - Subcutaneous
							ZSWIM1	0.000025	-0.24	Adipose - Visceral (Omentum)
							WFDC3	0.00003	-0.32	Testis
							NEURL2	0.000032	-0.22	Thyroid
							ZNF335	0.000033	0.1	Whole Blood
							WFDC3	0.000054	-0.25	Adipose - Subcutaneous
rs17576	46011586	rs3848722	46005181	6405	0.92	0.99	SLC12A5	0.000000000031	-0.51	Adrenal Gland
							NEURL2	0.000000013	-0.32	Adipose - Visceral (Omentum)
							NEURL2	0.000000052	-0.26	Adipose - Subcutaneous
							ZSWIM1	0.00000019	-0.29	Adipose - Visceral (Omentum)
							PLTP	0.0000004	-0.21	Nerve - Tibial
							PCIF1	0.00000079	0.34	Adrenal Gland
							PLTP	0.00000089	-0.2	Lung
							PLTP	0.0000014	-0.18	Artery - Tibial
							RP3-337O18.9	0.0000016	-0.22	Adipose - Subcutaneous
							SNX21	0.0000016	0.15	Muscle - Skeletal
							PLTP	0.0000038	-0.17	Adipose - Visceral (Omentum)
							CD40	0.0000038	0.27	Adipose - Visceral (Omentum)
							PLTP	0.0000096	-0.24	Brain - Hippocampus
							PLTP	0.00001	-0.24	Heart - Left Ventricle
							PLTP	0.000012	-0.27	Colon - Sigmoid
							SPATA25	0.000013	-0.28	Adipose - Visceral (Omentum)
							PLTP	0.000014	-0.16	Adipose - Subcutaneous
							RP3-337O18.9	0.000019	-0.24	Adipose - Visceral (Omentum)
							ZNF335	0.000034	0.1	Whole Blood
							WFDC3	0.000036	-0.23	Artery - Tibial
							WFDC10B	0.00004	0.36	Testis
							MMP9	0.000045	-0.21	Cells - Transformed fibroblasts
							PLTP	0.000063	-0.16	Thyroid
rs17576	46011586	rs4810482	46005911	5675	0.89	0.96	SLC12A5	0.000000000031	-0.51	Adrenal Gland
							NEURL2	0.000000013	-0.32	Adipose - Visceral (Omentum)
							NEURL2	0.000000052	-0.26	Adipose - Subcutaneous
							ZSWIM1	0.00000019	-0.29	Adipose - Visceral (Omentum)
							PLTP	0.0000004	-0.21	Nerve - Tibial
							PCIF1	0.00000079	0.34	Adrenal Gland
							PLTP	0.00000089	-0.2	Lung
							PLTP	0.0000014	-0.18	Artery - Tibial
							RP3-337O18.9	0.0000016	-0.22	Adipose - Subcutaneous
							SNX21	0.0000016	0.15	Muscle - Skeletal
							PLTP	0.0000038	-0.17	Adipose - Visceral (Omentum)
							CD40	0.0000038	0.27	Adipose - Visceral (Omentum)
							PLTP	0.0000096	-0.24	Brain - Hippocampus
							PLTP	0.00001	-0.24	Heart - Left Ventricle
							PLTP	0.000012	-0.27	Colon - Sigmoid
							SPATA25	0.000013	-0.28	Adipose - Visceral (Omentum)
							PLTP	0.000014	-0.16	Adipose - Subcutaneous
							RP3-337O18.9	0.000019	-0.24	Adipose - Visceral (Omentum)
							ZNF335	0.000034	0.1	Whole Blood
							WFDC3	0.000036	-0.23	Artery - Tibial
							WFDC10B	0.00004	0.36	Testis
							MMP9	0.000045	-0.21	Cells - Transformed fibroblasts
							PLTP	0.000063	-0.16	Thyroid
rs17576	46011586	rs3761158	46006273	5313	0.84	0.99	SLC12A5	0.00000000032	-0.48	Adrenal Gland
							NEURL2	0.000000016	-0.27	Adipose - Subcutaneous
							PLTP	0.00000026	-0.2	Lung
							ZSWIM1	0.00000031	-0.28	Adipose - Visceral (Omentum)
							NEURL2	0.00000054	-0.28	Adipose - Visceral (Omentum)
							PLTP	0.00000075	-0.18	Artery - Tibial
							PLTP	0.00000083	-0.27	Heart - Left Ventricle
							RP3-337O18.9	0.0000014	-0.22	Adipose - Subcutaneous
							PLTP	0.0000021	-0.2	Nerve - Tibial
							SPATA25	0.0000036	-0.29	Adipose - Visceral (Omentum)
							PLTP	0.0000037	-0.28	Colon - Sigmoid
							PLTP	0.0000038	-0.18	Thyroid
							PCIF1	0.0000094	0.31	Adrenal Gland
							CD40	0.000013	0.25	Adipose - Visceral (Omentum)
							PLTP	0.000013	-0.16	Adipose - Subcutaneous
							PLTP	0.000015	-0.15	Adipose - Visceral (Omentum)
							PLTP	0.00002	-0.29	Pituitary
							SNX21	0.000024	0.13	Muscle - Skeletal
							WFDC10B	0.000025	0.36	Testis
							MMP9	0.00003	-0.21	Cells - Transformed fibroblasts
							WFDC3	0.000031	-0.23	Artery - Tibial
rs17576	46011586	rs3761159	46006318	5268	0.94	0.99	SLC12A5	0.00000000004	-0.52	Adrenal Gland
							PLTP	0.00000001	-0.24	Lung
							PLTP	0.000000061	-0.23	Nerve - Tibial
							PLTP	0.00000032	-0.19	Artery - Tibial
							PCIF1	0.00000099	0.35	Adrenal Gland
							NEURL2	0.0000014	-0.28	Adipose - Visceral (Omentum)
							PLTP	0.0000025	-0.27	Heart - Left Ventricle
							NEURL2	0.0000026	-0.23	Adipose - Subcutaneous
							SNX21	0.0000034	0.15	Muscle - Skeletal
							PLTP	0.0000035	-0.22	Brain - Frontal Cortex (BA9)
							PLTP	0.0000046	-0.17	Adipose - Subcutaneous
							PLTP	0.0000064	-0.25	Brain - Hippocampus
							WFDC3	0.0000064	-0.26	Artery - Tibial
							PLTP	0.000012	-0.17	Thyroid
							PLTP	0.000014	-0.23	Artery - Aorta
							WFDC10B	0.000014	0.39	Testis
							PLTP	0.000019	-0.3	Adrenal Gland
							ZSWIM1	0.000022	-0.24	Adipose - Visceral (Omentum)
							PLTP	0.000026	-0.16	Adipose - Visceral (Omentum)
							NEURL2	0.000029	-0.22	Thyroid
							WFDC3	0.00003	-0.32	Testis
							RP3-337O18.9	0.000033	-0.2	Adipose - Subcutaneous
							NEURL2	0.000043	-0.21	Lung
rs17576	46011586	rs6065913	46006464	5122	0.99	0.98	SLC12A5	0.00000000000061	-0.57	Adrenal Gland
							PLTP	0.00000000013	-0.26	Lung
							PLTP	0.000000048	-0.24	Nerve - Tibial
							PLTP	0.00000028	-0.29	Heart - Left Ventricle
							PLTP	0.0000003	-0.19	Adipose - Subcutaneous
							PLTP	0.00000052	-0.19	Artery - Tibial
							NEURL2	0.0000014	-0.24	Adipose - Subcutaneous
							PLTP	0.0000016	-0.19	Thyroid
							PLTP	0.0000016	-0.23	Brain - Frontal Cortex (BA9)
							NEURL2	0.0000019	-0.28	Adipose - Visceral (Omentum)
							PLTP	0.000002	-0.25	Artery - Aorta
							PLTP	0.0000032	-0.26	Brain - Hippocampus
							NEURL2	0.0000046	-0.24	Lung
							PLTP	0.0000047	-0.29	Colon - Sigmoid
							PCIF1	0.0000073	0.33	Adrenal Gland
							NEURL2	0.0000092	-0.29	Artery - Aorta
							RP3-337O18.9	0.0000099	-0.21	Lung
							PLTP	0.000013	-0.31	Adrenal Gland
							ZSWIM1	0.000017	-0.25	Adipose - Visceral (Omentum)
							SNX21	0.00002	0.13	Muscle - Skeletal
							PLTP	0.000021	-0.16	Adipose - Visceral (Omentum)
							NEURL2	0.000022	-0.23	Thyroid
							ZNF335	0.000025	0.1	Whole Blood
							RP3-337O18.9	0.000027	-0.2	Adipose - Subcutaneous
rs17576	46011586	rs3918240	46006977	4609	0.99	0.98	SLC12A5	0.00000000000061	-0.57	Adrenal Gland
							PLTP	0.00000000013	-0.26	Lung
							PLTP	0.000000048	-0.24	Nerve - Tibial
							PLTP	0.00000028	-0.29	Heart - Left Ventricle
							PLTP	0.0000003	-0.19	Adipose - Subcutaneous
							PLTP	0.00000052	-0.19	Artery - Tibial
							NEURL2	0.0000014	-0.24	Adipose - Subcutaneous
							PLTP	0.0000016	-0.19	Thyroid
							PLTP	0.0000016	-0.23	Brain - Frontal Cortex (BA9)
							NEURL2	0.0000019	-0.28	Adipose - Visceral (Omentum)
							PLTP	0.000002	-0.25	Artery - Aorta
							PLTP	0.0000032	-0.26	Brain - Hippocampus
							NEURL2	0.0000046	-0.24	Lung
							PLTP	0.0000047	-0.29	Colon - Sigmoid
							PCIF1	0.0000073	0.33	Adrenal Gland
							NEURL2	0.0000092	-0.29	Artery - Aorta
							RP3-337O18.9	0.0000099	-0.21	Lung
							PLTP	0.000013	-0.31	Adrenal Gland
							ZSWIM1	0.000017	-0.25	Adipose - Visceral (Omentum)
							SNX21	0.00002	0.13	Muscle - Skeletal
							PLTP	0.000021	-0.16	Adipose - Visceral (Omentum)
							NEURL2	0.000022	-0.23	Thyroid
							ZNF335	0.000025	0.1	Whole Blood
							RP3-337O18.9	0.000027	-0.2	Adipose - Subcutaneous
rs17576	46011586	rs3918249	46009497	2089	0.99	0.99	SLC12A5	5.5e-14	-0.52	Adrenal Gland
							PLTP	1.5e-12	-0.25	Lung
							PLTP	1.3e-11	-0.28	Colon - Sigmoid
							NEURL2	4.3e-11	-0.26	Adipose - Subcutaneous
							MMP9	6.5e-10	-0.23	Cells - Cultured fibroblasts
							PLTP	1.2e-9	-0.17	Adipose - Subcutaneous
							RP3-337O18.9	1.2e-8	-0.21	Adipose - Subcutaneous
							NEURL2	1.4e-8	-0.24	Adipose - Visceral (Omentum)
							ZSWIM1	1.8e-8	-0.24	Adipose - Visceral (Omentum)
							ZNF335	2.6e-8	0.12	Skin - Not Sun Exposed (Suprapubic)
							PLTP	5.3e-8	-0.18	Nerve - Tibial
							PLTP	1.5e-7	-0.15	Artery - Tibial
							PLTP	1.6e-7	-0.15	Adipose - Visceral (Omentum)
							RP3-337O18.9	2.3e-7	-0.22	Lung
							ZNF335	2.8e-7	0.098	Whole Blood
							PLTP	2.9e-7	-0.16	Thyroid
							MMP9	3.4e-7	0.26	Skin - Not Sun Exposed (Suprapubic)
							RP11-465L10.10	4.1e-7	-0.41	Adrenal Gland
							SPATA25	5.6e-7	-0.25	Adipose - Visceral (Omentum)
							PLTP	5.7e-7	-0.21	Heart - Left Ventricle
							RP3-337O18.9	6.3e-7	-0.22	Adipose - Visceral (Omentum)
							NEURL2	0.0000011	-0.22	Lung
							PLTP	0.0000016	-0.17	Colon - Transverse
							PLTP	0.0000023	-0.12	Muscle - Skeletal
							RP3-337O18.9	0.0000035	-0.28	Colon - Sigmoid
							NEURL2	0.0000036	-0.20	Thyroid
							PCIF1	0.0000056	0.31	Adrenal Gland
							PLTP	0.000012	-0.22	Pituitary
							CD40	0.000013	0.19	Adipose - Visceral (Omentum)
							PLTP	0.000016	-0.19	Heart - Atrial Appendage
							CD40	0.000026	0.15	Skin - Sun Exposed (Lower leg)
							DNTTIP1	0.000029	-0.14	Spleen
							MMP9	0.000031	0.26	Testis
							DNTTIP1	0.000041	-0.12	Artery - Tibial
							NEURL2	0.000049	-0.22	Colon - Transverse
							PLTP	0.000049	-0.15	Artery - Aorta
							CD40	0.000057	0.15	Adipose - Subcutaneous
							PLTP	0.000062	-0.13	Esophagus - Muscularis
							WFDC3	0.000062	-0.18	Artery - Tibial
							RP3-337O18.9	0.000083	-0.24	Heart - Atrial Appendage
							DNTTIP1	0.00012	-0.049	Whole Blood
							SNX21	0.00014	0.10	Muscle - Skeletal
							WFDC10B	0.00019	0.14	Skin - Sun Exposed (Lower leg)
							SPATA25	0.00020	-0.19	Nerve - Tibial
rs17576	46011586	rs3918251	46010142	1444	0.84	0.93	PLTP	0.0000000076	-0.24	Lung
							SLC12A5	0.0000000082	-0.48	Adrenal Gland
							PLTP	0.00000003	-0.2	Artery - Tibial
							PLTP	0.000000057	-0.23	Nerve - Tibial
							NEURL2	0.0000015	-0.27	Adipose - Visceral (Omentum)
							PLTP	0.0000015	-0.17	Adipose - Visceral (Omentum)
							PLTP	0.0000018	-0.26	Heart - Left Ventricle
							PCIF1	0.0000021	0.35	Adrenal Gland
							NEURL2	0.0000022	-0.23	Adipose - Subcutaneous
							PLTP	0.000004	-0.24	Artery - Aorta
							PLTP	0.0000059	-0.17	Adipose - Subcutaneous
							PLTP	0.0000066	-0.24	Brain - Hippocampus
							NEURL2	0.00001	-0.29	Artery - Aorta
							ZSWIM1	0.000012	-0.25	Adipose - Visceral (Omentum)
							RP3-337O18.9	0.000012	-0.21	Lung
							PLTP	0.000019	-0.27	Colon - Sigmoid
							PLTP	0.00002	-0.31	Pituitary
							WFDC3	0.000024	-0.24	Artery - Tibial
							NEURL2	0.000024	-0.22	Lung
							SNX21	0.000028	0.13	Muscle - Skeletal
							RP3-337O18.9	0.00004	-0.19	Adipose - Subcutaneous
							PLTP	0.000041	-0.16	Thyroid
							NEURL2	0.000044	-0.22	Thyroid
rs17576	46011586	rs13969	46014194	-2608	0.83	-0.98	SLC12A5	0.000000000012	0.5	Adrenal Gland
							PLTP	0.000000000041	0.28	Nerve - Tibial
							NEURL2	0.000000000047	0.35	Adipose - Visceral (Omentum)
							PLTP	0.00000000011	0.23	Artery - Tibial
							PLTP	0.0000000028	0.24	Lung
							NEURL2	0.000000004	0.27	Adipose - Subcutaneous
							PLTP	0.0000000059	0.35	Colon - Sigmoid
							ZSWIM1	0.0000000059	0.31	Adipose - Visceral (Omentum)
							PLTP	0.000000034	0.2	Adipose - Subcutaneous
							RP3-337O18.9	0.000000051	0.29	Adipose - Visceral (Omentum)
							RP3-337O18.9	0.00000013	0.24	Lung
							SPATA25	0.00000014	0.32	Adipose - Visceral (Omentum)
							RP3-337O18.9	0.00000019	0.23	Adipose - Subcutaneous
							PLTP	0.00000023	0.18	Adipose - Visceral (Omentum)
							PLTP	0.00000091	0.25	Artery - Aorta
							SNX21	0.000001	-0.15	Muscle - Skeletal
							CD40	0.0000017	-0.27	Adipose - Visceral (Omentum)
							NEURL2	0.0000044	0.23	Lung
							NEURL2	0.0000055	0.29	Artery - Aorta
							PLTP	0.000013	0.24	Stomach
							PCIF1	0.000013	-0.3	Adrenal Gland
							SNX21	0.000022	0.17	Thyroid
							PLTP	0.000024	0.16	Thyroid
							CD40	0.000047	-0.19	Skin - Sun Exposed (Lower leg)
rs3787268	46013092	rs35610751	45991015	22077	0.87	0.94	NEURL2	0.0000011	-0.28	Adipose - Subcutaneous
							RP3-337O18.9	0.0000024	-0.27	Lung
							PLTP	0.0000041	-0.39	Adrenal Gland
							PLTP	0.0000058	-0.22	Lung
							SLC12A5	0.0000061	-0.44	Adipose - Visceral (Omentum)
							NEURL2	0.000012	-0.31	Adipose - Visceral (Omentum)
							RP3-337O18.9	0.000019	-0.3	Adipose - Visceral (Omentum)
							SPATA25	0.000029	-0.33	Adipose - Visceral (Omentum)
							PLTP	0.00005	-0.19	Thyroid
rs3787268	46013092	rs6073980	45991065	22027	0.86	0.94	NEURL2	0.0000009	-0.28	Adipose - Subcutaneous
							RP3-337O18.9	0.0000017	-0.27	Lung
							SLC12A5	0.0000044	-0.44	Adipose - Visceral (Omentum)
							PLTP	0.0000048	-0.38	Adrenal Gland
							PLTP	0.0000053	-0.22	Lung
							NEURL2	0.000012	-0.31	Adipose - Visceral (Omentum)
							RP3-337O18.9	0.000021	-0.29	Adipose - Visceral (Omentum)
							PLTP	0.000026	-0.25	Artery - Aorta
							SPATA25	0.000026	-0.33	Adipose - Visceral (Omentum)
							PLTP	0.000046	-0.17	Artery - Tibial
rs3787268	46013092	rs6073983	46001252	11840	0.89	0.98	NEURL2	0.00000085	-0.29	Adipose - Subcutaneous
							SLC12A5	0.0000019	-0.46	Adipose - Visceral (Omentum)
							RP3-337O18.9	0.0000024	-0.27	Lung
							PLTP	0.0000024	-0.23	Lung
							PLTP	0.000016	-0.35	Adrenal Gland
							PLTP	0.000055	-0.17	Artery - Tibial
rs3787268	46013092	rs3761157	46006183	6909	0.98	0.99	NEURL2	-0.28	Adipose - Subcutaneous
							SLC12A5	-0.46	Adipose - Visceral (Omentum)
							RP3-337O18.9	-0.28	Lung
							PLTP	-0.24	Lung
							PLTP	-0.37	Adrenal Gland
rs3787268	46013092	rs3918262	46015131	-2039	1	1	SLC12A5	0.00000022	-0.5	Adipose - Visceral (Omentum)
							PLTP	0.0000014	-0.24	Lung
							NEURL2	0.0000021	-0.28	Adipose - Subcutaneous
							PLTP	0.0000038	-0.39	Adrenal Gland
							RP3-337O18.9	0.0000044	-0.26	Lung
							CD40	0.000025	0.24	Skin - Sun Exposed (Lower leg)
							PLTP	0.000036	-0.18	Artery - Tibial
rs3787268	46013092	rs6073989	46022571	-9479	0.95	0.98	SLC12A5	0.00000022	-0.5	Adipose - Visceral (Omentum)
							RP3-337O18.9	0.0000037	-0.27	Lung
							PLTP	0.0000039	-0.23	Lung
							PLTP	0.0000051	-0.39	Adrenal Gland
							NEURL2	0.0000066	-0.27	Adipose - Subcutaneous
							CD40	0.00003	0.24	Skin - Sun Exposed (Lower leg)
							PLTP	0.00005	-0.18	Artery - Tibial
rs3787268	46013092	rs16991010	46023675	-10583	0.95	0.98	SLC12A5	0.00000022	-0.5	Adipose - Visceral (Omentum)
							PLTP	0.0000023	-0.24	Lung
							RP3-337O18.9	0.0000032	-0.27	Lung
							PLTP	0.0000038	-0.39	Adrenal Gland
							NEURL2	0.0000066	-0.27	Adipose - Subcutaneous
							CD40	0.00003	0.24	Skin - Sun Exposed (Lower leg)
							PLTP	0.00005	-0.18	Artery - Tibial
rs3787268	46013092	rs6130998	46024480	-11388	0.95	0.98	SLC12A5	0.00000022	-0.5	Adipose - Visceral (Omentum)
							PLTP	0.0000023	-0.24	Lung
							RP3-337O18.9	0.0000032	-0.27	Lung
							PLTP	0.0000038	-0.39	Adrenal Gland
							NEURL2	0.0000066	-0.27	Adipose - Subcutaneous
							CD40	0.00003	0.24	Skin - Sun Exposed (Lower leg)
							PLTP	0.00005	-0.18	Artery - Tibial
rs3787268	46013092	rs6130999	46026853	-13761	0.95	0.98	SLC12A5	0.00000022	-0.5	Adipose - Visceral (Omentum)
							PLTP	0.0000023	-0.24	Lung
							RP3-337O18.9	0.0000032	-0.27	Lung
							PLTP	0.0000038	-0.39	Adrenal Gland
							NEURL2	0.0000066	-0.27	Adipose - Subcutaneous
							CD40	0.00003	0.24	Skin - Sun Exposed (Lower leg)
							PLTP	0.00005	-0.18	Artery - Tibial
rs3787268	46013092	rs6073991	46027473	-14381	0.95	0.98	SLC12A5	0.00000022	-0.5	Adipose - Visceral (Omentum)
							PLTP	0.0000023	-0.24	Lung
							RP3-337O18.9	0.0000032	-0.27	Lung
							PLTP	0.0000038	-0.39	Adrenal Gland
							NEURL2	0.0000066	-0.27	Adipose - Subcutaneous
							CD40	0.00003	0.24	Skin - Sun Exposed (Lower leg)
							PLTP	0.00005	-0.18	Artery - Tibial
rs3787268	46013092	rs13039389	46031067	-17975	0.91	0.97	SLC12A5	0.00000022	-0.5	Adipose - Visceral (Omentum)
							RP3-337O18.9	0.0000037	-0.27	Lung
							PLTP	0.0000039	-0.23	Lung
							PLTP	0.0000051	-0.39	Adrenal Gland
							NEURL2	0.0000066	-0.27	Adipose - Subcutaneous
							CD40	0.00003	0.24	Skin - Sun Exposed (Lower leg)
							PLTP	0.00005	-0.18	Artery - Tibial
rs3787268	46013092	rs6131001	46032717	-19625	0.94	0.98	SLC12A5	0.00000036	-0.49	Adipose - Visceral (Omentum)
							PLTP	0.0000033	-0.23	Lung
							PLTP	0.0000051	-0.39	Adrenal Gland
							NEURL2	0.0000066	-0.27	Adipose - Subcutaneous
							RP3-337O18.9	0.000011	-0.26	Lung
							PLTP	0.000029	-0.26	Artery - Aorta
							PLTP	0.000057	-0.18	Artery - Tibial
rs2250889	46013767	rs6094239	46024910	-11143	0.92	0.97	PLTP	0.000016	0.39	Esophagus - Mucosa
							PLTP	0.000035	0.33	Skin - Sun Exposed (Lower leg)
rs17577	46014472	rs1888235	45995328	19144	0.94	0.98	SLC12A5	0.00000000000000019	0.58	Lung
							SLC12A5	0.00000000000022	0.75	Adipose - Visceral (Omentum)
							SLC12A5	0.0000000053	0.54	Adipose - Subcutaneous
							SLC12A5	0.00000012	-0.62	Adrenal Gland
							SLC12A5	0.00000015	0.63	Artery - Aorta
							SLC12A5	0.00000033	0.66	Breast - Mammary Tissue
							SLC12A5	0.00000046	0.74	Spleen
							SNX21	0.0000006	0.21	Muscle - Skeletal
							SLC12A5	0.0000026	0.46	Thyroid
							SLC12A5	0.00001	0.4	Nerve - Tibial
							SLC12A5	0.000022	0.46	Skin - Not Sun Exposed (Suprapubic)
							PLTP	0.000031	-0.24	Nerve - Tibial
							SLC12A5	0.000034	0.38	Skin - Sun Exposed (Lower leg)
rs17577	46014472	rs6073984	46002014	12458	0.94	0.98	SLC12A5	0.00000000000000019	0.58	Lung
							SLC12A5	0.00000000000022	0.75	Adipose - Visceral (Omentum)
							SLC12A5	0.0000000053	0.54	Adipose - Subcutaneous
							SLC12A5	0.000000098	-0.63	Adrenal Gland
							SLC12A5	0.00000015	0.63	Artery - Aorta
							SLC12A5	0.00000023	0.67	Breast - Mammary Tissue
							SLC12A5	0.00000025	0.77	Spleen
							SNX21	0.0000006	0.21	Muscle - Skeletal
							SLC12A5	0.000007	0.44	Thyroid
							SLC12A5	0.00001	0.4	Nerve - Tibial
							SLC12A5	0.000028	0.46	Skin - Not Sun Exposed (Suprapubic)
							PLTP	0.000031	-0.24	Nerve - Tibial
							SLC12A5	0.000034	0.38	Skin - Sun Exposed (Lower leg)
rs17577	46014472	rs6065912	46003728	10744	0.84	0.98	SLC12A5	0.000000000000033	0.8	Adipose - Visceral (Omentum)
							SLC12A5	0.00000000000026	0.54	Lung
							SLC12A5	0.00000004	0.84	Spleen
							SLC12A5	0.00000012	0.51	Adipose - Subcutaneous
							SLC12A5	0.00000026	0.64	Artery - Aorta
							SNX21	0.00000039	0.23	Muscle - Skeletal
							SLC12A5	0.0000046	-0.57	Adrenal Gland
							SLC12A5	0.000014	0.41	Nerve - Tibial
							PLTP	0.000018	-0.26	Nerve - Tibial
							PLTP	0.000019	-0.28	Lung
							SLC12A5	0.000021	0.59	Breast - Mammary Tissue
							SLC12A5	0.000025	0.4	Skin - Sun Exposed (Lower leg)
							SLC12A5	0.000028	0.42	Thyroid
							SLC12A5	0.000036	0.47	Skin - Not Sun Exposed (Suprapubic)
							WFDC3	0.000058	-0.4	Nerve - Tibial
rs17577	46014472	rs3918241	46007096	7376	0.98	1	SLC12A5	0.0000000000000000059	0.61	Lung
							SLC12A5	0.0000000000000016	0.8	Adipose - Visceral (Omentum)
							SLC12A5	0.00000000002	0.61	Adipose - Subcutaneous
							SLC12A5	0.000000045	0.69	Breast - Mammary Tissue
							SLC12A5	0.000000082	0.63	Artery - Aorta
							SLC12A5	0.00000018	0.78	Spleen
							SNX21	0.00000098	0.21	Muscle - Skeletal
							SLC12A5	0.0000023	-0.56	Adrenal Gland
							SLC12A5	0.0000024	0.43	Nerve - Tibial
							SLC12A5	0.0000024	0.45	Thyroid
							SLC12A5	0.0000035	43466	Uterus
							SLC12A5	0.0000054	0.41	Skin - Sun Exposed (Lower leg)
							SLC12A5	0.00001	0.48	Skin - Not Sun Exposed (Suprapubic)
							PLTP	0.000056	-0.24	Nerve - Tibial
rs17577	46014472	rs3918242	46007337	7135	0.98	1	SLC12A5	0.0000000000000000059	0.61	Lung
							SLC12A5	0.0000000000000016	0.8	Adipose - Visceral (Omentum)
							SLC12A5	0.000000000045	0.6	Adipose - Subcutaneous
							SLC12A5	0.000000045	0.69	Breast - Mammary Tissue
							SLC12A5	0.000000082	0.63	Artery - Aorta
							SLC12A5	0.00000018	0.78	Spleen
							SLC12A5	0.00000019	-0.61	Adrenal Gland
							SNX21	0.00000099	0.21	Muscle - Skeletal
							SLC12A5	0.0000029	0.45	Thyroid
							SLC12A5	0.0000037	0.43	Nerve - Tibial
							SLC12A5	0.0000038	43466	Uterus
							SLC12A5	0.0000053	0.41	Skin - Sun Exposed (Lower leg)
							SLC12A5	0.00001	0.48	Skin - Not Sun Exposed (Suprapubic)
							PLTP	0.000028	-0.25	Nerve - Tibial
rs17577	46014472	rs2274755	46011053	3419	0.99	1	SLC12A5	8.9E-22	0.66	Lung
							SLC12A5	0.0000000000000002	0.81	Adipose - Visceral (Omentum)
							SLC12A5	0.00000000000003	0.68	Adipose - Subcutaneous
							SLC12A5	0.00000000011	0.77	Breast - Mammary Tissue
							SLC12A5	0.00000000015	0.88	Spleen
							SLC12A5	0.000000023	0.67	Artery - Aorta
							SLC12A5	0.00000014	0.49	Thyroid
							SLC12A5	0.00000038	43466	Uterus
							SLC12A5	0.0000029	0.44	Nerve - Tibial
							SNX21	0.0000032	0.2	Muscle - Skeletal
							SLC12A5	0.0000058	0.41	Skin - Sun Exposed (Lower leg)
							SLC12A5	0.000014	0.66	Artery - Coronary
							SLC12A5	0.000031	0.44	Skin - Not Sun Exposed (Suprapubic)
rs17577	46014472	rs2236416	46011936	2536	0.99	1	SLC12A5	0.0000000000000000005	0.63	Lung
							SLC12A5	0.0000000000000034	0.79	Adipose - Visceral (Omentum)
							SLC12A5	0.0000000000083	0.62	Adipose - Subcutaneous
							SLC12A5	0.000000012	0.71	Breast - Mammary Tissue
							SLC12A5	0.000000055	0.78	Spleen
							SLC12A5	0.00000006	0.65	Artery - Aorta
							SLC12A5	0.00000095	0.45	Skin - Sun Exposed (Lower leg)
							SLC12A5	0.0000015	0.46	Nerve - Tibial
							SLC12A5	0.0000016	0.46	Thyroid
							SLC12A5	0.000002	0.51	Skin - Not Sun Exposed (Suprapubic)
							SLC12A5	0.0000021	-0.57	Adrenal Gland
							SLC12A5	0.0000038	43466	Uterus
							SNX21	0.0000049	0.2	Muscle - Skeletal
rs17577	46014472	rs3918261	46014953	-481	1	1	SLC12A5	7.5E-22	0.65	Lung
							SLC12A5	0.000000000000000087	0.81	Adipose - Visceral (Omentum)
							SLC12A5	0.000000000000001	0.71	Adipose - Subcutaneous
							SLC12A5	0.000000000032	0.79	Breast - Mammary Tissue
							SLC12A5	0.00000000004	0.87	Spleen
							SLC12A5	0.000000033	0.66	Artery - Aorta
							SLC12A5	0.00000029	0.48	Thyroid
							SLC12A5	0.00000038	43466	Uterus
							SLC12A5	0.00000053	0.47	Nerve - Tibial
							SLC12A5	0.0000012	0.43	Skin - Sun Exposed (Lower leg)
							SNX21	0.0000028	0.2	Muscle - Skeletal
							SLC12A5	0.000014	0.66	Artery - Coronary
							SLC12A5	0.000031	0.44	Skin - Not Sun Exposed (Suprapubic)
rs17577	46014472	rs13925	46016326	-1854	1	1	SLC12A5	3e-21	0.66	Lung
							SLC12A5	0.0000000000000004	0.8	Adipose - Visceral (Omentum)
							SLC12A5	0.000000000000007	0.69	Adipose - Subcutaneous
							SLC12A5	0.000000000099	0.88	Spleen
							SLC12A5	0.00000000036	0.76	Breast - Mammary Tissue
							SLC12A5	0.0000002	0.49	Thyroid
							SLC12A5	0.00000021	0.62	Artery - Aorta
							SLC12A5	0.00000024	0.48	Nerve - Tibial
							SLC12A5	0.00000026	43466	Uterus
							SLC12A5	0.00000034	0.46	Skin - Sun Exposed (Lower leg)
							SLC12A5	0.0000046	0.49	Skin - Not Sun Exposed (Suprapubic)
							SLC12A5	0.0000056	0.7	Artery - Coronary
							SNX21	0.000013	0.18	Muscle - Skeletal
							SLC12A5	0.000019	-0.51	Adrenal Gland
rs17577	46014472	rs3918270	46016700	-2228	0.98	1	SLC12A5	1.7E-21	0.65	Lung
							SLC12A5	0.00000000000000016	0.81	Adipose - Visceral (Omentum)
							SLC12A5	0.0000000000000025	0.7	Adipose - Subcutaneous
							SLC12A5	0.00000000004	0.87	Spleen
							SLC12A5	0.000000000069	0.79	Breast - Mammary Tissue
							SLC12A5	0.000000056	0.65	Artery - Aorta
							SLC12A5	0.00000017	0.5	Thyroid
							SLC12A5	0.00000038	43466	Uterus
							SLC12A5	0.00000055	0.47	Nerve - Tibial
							SLC12A5	0.0000013	0.43	Skin - Sun Exposed (Lower leg)
							SNX21	0.000003	0.2	Muscle - Skeletal
							SLC12A5	0.000014	0.66	Artery - Coronary
rs17577	46014472	rs3918271	46016954	-2482	0.95	0.97	SLC12A5	2.1E-21	0.66	Lung
							SLC12A5	0.00000000000000035	0.81	Adipose - Visceral (Omentum)
							SLC12A5	0.0000000000000039	0.7	Adipose - Subcutaneous
							SLC12A5	0.00000000042	0.76	Breast - Mammary Tissue
							SLC12A5	0.00000000078	0.87	Spleen
							SLC12A5	0.000000015	0.67	Artery - Aorta
							SLC12A5	0.000000095	0.5	Thyroid
							SLC12A5	0.00000061	0.47	Nerve - Tibial
							SLC12A5	0.0000016	0.43	Skin - Sun Exposed (Lower leg)
							SLC12A5	0.0000024	1	Uterus
							SNX21	0.0000031	0.2	Muscle - Skeletal
							PLTP	0.000017	-0.43	Pituitary
rs17577	46014472	rs66553311	46020003	-5531	0.84	1	SLC12A5	0.0000000000018	0.45	Lung
							SLC12A5	0.000000000023	0.62	Adipose - Visceral (Omentum)
							SLC12A5	0.00000000036	0.51	Adipose - Subcutaneous
							SLC12A5	0.00000028	0.53	Breast - Mammary Tissue
							SLC12A5	0.000003	0.61	Spleen
							RPL13P2	0.000013	-0.47	Testis
rs17577	46014472	rs10432735	46021679	-7207	0.91	0.98	SLC12A5	8.9E-22	0.66	Lung
							SLC12A5	0.000000000000000086	0.82	Adipose - Visceral (Omentum)
							SLC12A5	0.0000000000000019	0.71	Adipose - Subcutaneous
							SLC12A5	0.000000000032	0.79	Breast - Mammary Tissue
							SLC12A5	0.000000000046	0.89	Spleen
							SLC12A5	0.000000033	0.66	Artery - Aorta
							SLC12A5	0.00000029	0.48	Thyroid
							SLC12A5	0.00000038	43466	Uterus
							SLC12A5	0.00000053	0.47	Nerve - Tibial
							SLC12A5	0.0000011	0.44	Skin - Sun Exposed (Lower leg)
							SNX21	0.0000065	0.19	Muscle - Skeletal
							SLC12A5	0.000014	0.66	Artery - Coronary
							SLC12A5	0.000031	0.44	Skin - Not Sun Exposed (Suprapubic)
