# Supplementary material for: Functionally significant polymorphisms of the MMP-9 gene are associated with peptic ulcer disease in the Caucasian population of Central Russia
Source: Sci Rep. 2021 Jun 29;11:13515. doi: 10.1038/s41598-021-92527-y (PMC8241834; doi:10.1038/s41598-021-92527-y)
Supplement: Supplementary file 7 — Supplementary Information 7. [file 41598_2021_92527_MOESM7_ESM.xlsx]

## Sheet: Лист1
Supplementary table 6
sQTL values of the PUD-associated SNPs of the MMP-9 gene
(according to Genotype-Tissue Expression (GTEx) (http://www.gtexportal.org/)) ( р <8.0E5. FDR≤0.05)
SNP	Gene Symbol	Variant Id	Phenotype Id	Intron Id	p	Effect Size (β)	Tissue
rs3918249	SLC12A5	chr20_46009497_T_C_b38	chr20:46021886:46023369:clu_29529:ENSG00000124140.13	46021886:46023369:clu_29529	3.0e-12	0.63	Pituitary
	SLC12A5	chr20_46009497_T_C_b38	chr20:46021886:46023369:clu_53353:ENSG00000124140.13	46021886:46023369:clu_53353	9.9e-9	0.49	Testis
	SLC12A5	chr20_46009497_T_C_b38	chr20:46023071:46023369:clu_24852:ENSG00000124140.13	46023071:46023369:clu_24852	2.9e-7	-0.44	Brain - Cortex
	SLC12A5	chr20_46009497_T_C_b38	chr20:46021886:46023369:clu_19068:ENSG00000124140.13	46021886:46023369:clu_19068	5.6e-7	0.61	Brain - Substantia nigra
	SLC12A5	chr20_46009497_T_C_b38	chr20:46023071:46023369:clu_25498:ENSG00000124140.13	46023071:46023369:clu_25498	7.8e-7	-0.32	Brain - Cerebellar Hemisphere
	SLC12A5	chr20_46009497_T_C_b38	chr20:46021886:46023369:clu_26648:ENSG00000124140.13	46021886:46023369:clu_26648	0.0000020	0.45	Brain - Cerebellum
	SLC12A5	chr20_46009497_T_C_b38	chr20:46021886:46023369:clu_27001:ENSG00000124140.13	46021886:46023369:clu_27001	0.0000062	0.45	Spleen
rs17576	SLC12A5	chr20_46011586_A_G_b38	chr20:46021886:46023369:clu_29529:ENSG00000124140.13	46021886:46023369:clu_29529	9.3e-12	0.63	Pituitary
	SLC12A5	chr20_46011586_A_G_b38	chr20:46023071:46023369:clu_24852:ENSG00000124140.13	46023071:46023369:clu_24852	3.3e-7	-0.45	Brain - Cortex
	SLC12A5	chr20_46011586_A_G_b38	chr20:46021886:46023369:clu_26648:ENSG00000124140.13	46021886:46023369:clu_26648	0.0000020	0.46	Brain - Cerebellum
	SLC12A5	chr20_46011586_A_G_b38	chr20:46021886:46023369:clu_53353:ENSG00000124140.13	46021886:46023369:clu_53353	0.000011	0.38	Testis
rs3787268	PLTP	chr20_46013092_G_A_b38	chr20:45907904:45909942:clu_30841:ENSG00000100979.14	45907904:45909942:clu_30841	1.6e-7	0.36	Adipose - Subcutaneous
	PLTP	chr20_46013092_G_A_b38	chr20:45907904:45909942:clu_31248:ENSG00000100979.14	45907904:45909942:clu_31248	0.0000011	0.41	Breast - Mammary Tissue
	PLTP	chr20_46013092_G_A_b38	chr20:45907904:45909942:clu_31643:ENSG00000100979.14	45907904:45909942:clu_31643	0.0000096	0.32	Skin - Sun Exposed (Lower leg)
rs2250889	SLC12A5	chr20_46013767_G_C_b38	chr20:46021886:46023369:clu_29529:ENSG00000124140.13	46021886:46023369:clu_29529	4.7e-9	1	Pituitary
rs17577	SLC12A5	chr20_46014472_G_A_b38	chr20:46021886:46023369:clu_29529:ENSG00000124140.13	46021886:46023369:clu_29529	1.1e-10	0.88	Pituitary
	CD40	chr20_46014472_G_A_b38	chr20:46126741:46128138:clu_32508:ENSG00000101017.13	46126741:46128138:clu_32508	6.0e-9	0.45	Lung
	CD40	chr20_46014472_G_A_b38	chr20:46126741:46128138:clu_32508:ENSG00000101017.13	46126741:46128138:clu_32508	6.0e-9	0.45	Lung
	CD40	chr20_46014472_G_A_b38	chr20:46126741:46128138:clu_33045:ENSG00000101017.13	46126741:46128138:clu_33045	4.3e-8	0.46	Thyroid
	CD40	chr20_46014472_G_A_b38	chr20:46126741:46128138:clu_27442:ENSG00000101017.13	46126741:46128138:clu_27442	3.8e-7	0.49	Artery - Aorta
	CD40	chr20_46014472_G_A_b38	chr20:46126741:46128138:clu_22055:ENSG00000101017.13	46126741:46128138:clu_22055	9.2e-7	0.76	Cells - EBV-transformed lymphocytes
	SLC12A5	chr20_46014472_G_A_b38	chr20:46023071:46023369:clu_25498:ENSG00000124140.13	46023071:46023369:clu_25498	0.0000012	-0.43	Brain - Cerebellar Hemisphere
	ACOT8	chr20_46014472_G_A_b38	chr20:45841956:45844263:clu_24540:ENSG00000101473.16	45841956:45844263:clu_24540	0.0000018	0.56	Heart - Left Ventricle
	ACOT8	chr20_46014472_G_A_b38	chr20:45841956:45844263:clu_27123:ENSG00000101473.16	45841956:45844263:clu_27123	0.0000021	0.49	Heart - Atrial Appendage
	SLC12A5	chr20_46014472_G_A_b38	chr20:46023071:46023369:clu_32502:ENSG00000124140.13	46023071:46023369:clu_32502	0.000017	-0.41	Lung
