# Supplementary material for: Functionally significant polymorphisms of the MMP-9 gene are associated with peptic ulcer disease in the Caucasian population of Central Russia
Source: Sci Rep. 2021 Jun 29;11:13515. doi: 10.1038/s41598-021-92527-y (PMC8241834; doi:10.1038/s41598-021-92527-y)
Supplement: Supplementary file 8 — Supplementary Information 8. [file 41598_2021_92527_MOESM8_ESM.xlsx]

## Sheet: Лист1
Supplementary table 7
Effect of SNPs in high LD (r2≥0.80) with the PUD-associated polymorphisms of the MMP-9 gene on alternative splicing (cis-sQTL)
(according to Genotype-Tissue Expression (GTEx) (http://www.gtexportal.org/)) ( р <8.0E5, FDR≤0.05)
Lead SNP	Position lead SNP(hg38)	Proxy SNP	Position proxy SNP (hg38)	Distance (bp) between proxy and lead SNP	r2 between lead and proxy	D between lead and proxy	Gene Symbol	Intron Id	p	Effect Size (β)	Tissue
rs3918249	46009497	rs6017721	45987758	21739	0.83	0.94	SLC12A5	46021886:46023369:clu_29529	0.00000000000031	0.64	Pituitary
							SLC12A5	46021886:46023369:clu_53353	0.0000000048	0.48	Testis
							SLC12A5	46021886:46023369:clu_26648	0.000000039	0.5	Brain - Cerebellum
							SLC12A5	46023071:46023369:clu_24852	0.000000041	-0.46	Brain - Cortex
							SLC12A5	46023071:46023369:clu_25498	0.0000014	-0.3	Brain - Cerebellar Hemisphere
rs3918249	46009497	rs3848721	46005037	4460	0.94	0.99	SLC12A5	46021886:46023369:clu_29529	0.0000000002	0.58	Pituitary
							SLC12A5	46023071:46023369:clu_24852	0.0000013	-0.42	Brain - Cortex
rs3918249	46009497	rs3848722	46005181	4316	0.94	0.99	SLC12A5	46021886:46023369:clu_29529	0.000000000047	0.59	Pituitary
							SLC12A5	46021886:46023369:clu_53353	0.000000075	0.45	Testis
							SLC12A5	46021886:46023369:clu_19068	0.00000068	0.59	Brain - Substantia nigra
							SLC12A5	46023071:46023369:clu_24852	0.00000079	-0.42	Brain - Cortex
rs3918249	46009497	rs4810482	46005911	3586	0.9	0.96	SLC12A5	46021886:46023369:clu_29529	0.0000000000073	0.61	Pituitary
							SLC12A5	46021886:46023369:clu_53353	0.000000052	0.46	Testis
							SLC12A5	46023071:46023369:clu_24852	0.00000037	-0.43	Brain - Cortex
							SLC12A5	46021886:46023369:clu_19068	0.00000051	0.59	Brain - Substantia nigra
rs3918249	46009497	rs3761158	46006273	3224	0.85	0.99	SLC12A5	46021886:46023369:clu_29529	0.000000000000005	0.68	Pituitary
							SLC12A5	46021886:46023369:clu_26648	0.000000000018	0.6	Brain - Cerebellum
							SLC12A5	46021886:46023369:clu_53353	0.000000000035	0.53	Testis
							SLC12A5	46023071:46023369:clu_24852	0.0000000012	-0.51	Brain - Cortex
							SLC12A5	46023071:46023369:clu_25498	0.00000012	-0.32	Brain - Cerebellar Hemisphere
rs3918249	46009497	rs3761159	46006318	3179	0.95	0.99	SLC12A5	46021886:46023369:clu_29529	0.00000000029	0.58	Pituitary
							SLC12A5	46023071:46023369:clu_24852	0.0000017	-0.41	Brain - Cortex
							SNX21	45835116:45840448:clu_27244	0.0000069	-0.24	Muscle - Skeletal
rs3918249	46009497	rs6065913	46006464	3033	0.99	0.99	SLC12A5	46021886:46023369:clu_29529	0.0000000001	0.59	Pituitary
							SLC12A5	46023071:46023369:clu_24852	0.00000072	-0.43	Brain - Cortex
rs3918249	46009497	rs3918240	46006977	2520	0.99	0.99	SLC12A5	46021886:46023369:clu_29529	0.0000000001	0.59	Pituitary
							SLC12A5	46023071:46023369:clu_24852	0.00000072	-0.43	Brain - Cortex
rs3918249	46009497	rs3918251	46010142	-645	0.83	0.92	SLC12A5	46021886:46023369:clu_29529	0.0000000093	0.54	Pituitary
							ACOT8	45841956:45844263:clu_27123	0.00000011	0.41	Heart - Atrial Appendage
							SNX21	45835116:45840448:clu_27244	0.0000036	-0.24	Muscle - Skeletal
							PLTP	45910070:45911152:clu_24801	0.0000056	-0.23	Whole Blood
							ACOT8	45841956:45844263:clu_31805	0.0000064	0.25	Nerve - Tibial
rs3918249	46009497	rs17576	46011586	-2089	0.99	0.99	SLC12A5	46021886:46023369:clu_29529	0.0000000000093	0.63	Pituitary
							SLC12A5	46023071:46023369:clu_24852	0.00000033	-0.45	Brain - Cortex
							SLC12A5	46021886:46023369:clu_26648	0.000002	0.46	Brain - Cerebellum
							SLC12A5	46021886:46023369:clu_53353	0.000011	0.38	Testis
rs3918249	46009497	rs13969	46014194	-4697	0.82	-0.98	ACOT8	45841956:45844263:clu_24540	0.00000038	-0.41	Heart - Left Ventricle
rs17576	46011586	rs6017721	45987758	23828	0.82	0.94	SLC12A5	46021886:46023369:clu_29529	0.00000000000031	0.64	Pituitary
							SLC12A5	46021886:46023369:clu_53353	0.0000000048	0.48	Testis
							SLC12A5	46021886:46023369:clu_26648	0.000000039	0.5	Brain - Cerebellum
							SLC12A5	46023071:46023369:clu_24852	0.000000041	-0.46	Brain - Cortex
							SLC12A5	46023071:46023369:clu_25498	0.0000014	-0.3	Brain - Cerebellar Hemisphere
rs17576	46011586	rs3848721	46005037	6549	0.92	0.99	SLC12A5	46021886:46023369:clu_29529	0.0000000002	0.58	Pituitary
							SLC12A5	46023071:46023369:clu_24852	0.0000013	-0.42	Brain - Cortex
rs17576	46011586	rs3848722	46005181	6405	0.92	0.99	SLC12A5	46021886:46023369:clu_29529	0.000000000047	0.59	Pituitary
							SLC12A5	46021886:46023369:clu_53353	0.000000075	0.45	Testis
							SLC12A5	46021886:46023369:clu_19068	0.00000068	0.59	Brain - Substantia nigra
							SLC12A5	46023071:46023369:clu_24852	0.00000079	-0.42	Brain - Cortex
rs17576	46011586	rs4810482	46005911	5675	0.89	0.96	SLC12A5	46021886:46023369:clu_29529	0.0000000000073	0.61	Pituitary
							SLC12A5	46021886:46023369:clu_53353	0.000000052	0.46	Testis
							SLC12A5	46023071:46023369:clu_24852	0.00000037	-0.43	Brain - Cortex
							SLC12A5	46021886:46023369:clu_19068	0.00000051	0.59	Brain - Substantia nigra
rs17576	46011586	rs3761158	46006273	5313	0.84	0.99	SLC12A5	46021886:46023369:clu_29529	0.000000000000005	0.68	Pituitary
							SLC12A5	46021886:46023369:clu_26648	0.000000000018	0.6	Brain - Cerebellum
							SLC12A5	46021886:46023369:clu_53353	0.000000000035	0.53	Testis
							SLC12A5	46023071:46023369:clu_24852	0.0000000012	-0.51	Brain - Cortex
							SLC12A5	46023071:46023369:clu_25498	0.00000012	-0.32	Brain - Cerebellar Hemisphere
							SLC12A5	46021886:46023369:clu_24670	0.000055	0.31	Cells - Cultured fibroblasts
rs17576	46011586	rs3761159	46006318	5268	0.94	0.99	SLC12A5	46021886:46023369:clu_29529	0.00000000029	0.58	Pituitary
							SLC12A5	46023071:46023369:clu_24852	0.0000017	-0.41	Brain - Cortex
							SNX21	45835116:45840448:clu_27244	0.0000069	-0.24	Muscle - Skeletal
rs17576	46011586	rs6065913	46006464	5122	0.99	0.98	SLC12A5	46021886:46023369:clu_29529	0.0000000001	0.59	Pituitary
							SLC12A5	46023071:46023369:clu_24852	0.00000072	-0.43	Brain - Cortex
rs17576	46011586	rs3918240	46006977	4609	0.99	0.98	SLC12A5	46021886:46023369:clu_29529	0.0000000001	0.59	Pituitary
							SLC12A5	46023071:46023369:clu_24852	0.00000072	-0.43	Brain - Cortex
rs17576	46011586	rs3918249	46009497	2089	0.99	0.99	SLC12A5	46021886:46023369:clu_29529	0.000000000003	0.63	Pituitary
							SLC12A5	46021886:46023369:clu_53353	0.0000000099	0.49	Testis
							SLC12A5	46023071:46023369:clu_24852	0.00000029	-0.44	Brain - Cortex
							SLC12A5	46021886:46023369:clu_19068	0.00000056	0.61	Brain - Substantia nigra
							SLC12A5	46023071:46023369:clu_25498	0.00000078	-0.32	Brain - Cerebellar Hemisphere
							SLC12A5	46021886:46023369:clu_26648	0.000002	0.45	Brain - Cerebellum
							SLC12A5	46021886:46023369:clu_27001	0.0000062	0.45	Spleen
rs17576	46011586	rs3918251	46010142	1444	0.84	0.93	SLC12A5	46021886:46023369:clu_29529	0.0000000093	0.54	Pituitary
							ACOT8	45841956:45844263:clu_27123	0.00000011	0.41	Heart - Atrial Appendage
							SNX21	45835116:45840448:clu_27244	0.0000036	-0.24	Muscle - Skeletal
							PLTP	45910070:45911152:clu_24801	0.0000056	-0.23	Whole Blood
							ACOT8	45841956:45844263:clu_31805	0.0000064	0.25	Nerve - Tibial
rs17576	46011586	rs13969	46014194	-2608	0.83	-0.98	ACOT8	45841956:45844263:clu_24540	0.00000038	-0.41	Heart - Left Ventricle
rs3787268	46013092	rs35610751	45991015	22077	0.87	0.94	PLTP	45907904:45909942:clu_30841	0.00000011	0.37	Adipose - Subcutaneous
							PLTP	45907904:45909942:clu_31248	0.0000012	0.41	Breast - Mammary Tissue
							PLTP	45907904:45909942:clu_31643	0.0000025	0.33	Skin - Sun Exposed (Lower leg)
							PLTP	45907904:45909942:clu_32475	0.000008	0.34	Lung
rs3787268	46013092	rs6073980	45991065	22027	0.86	0.94	PLTP	45907904:45909942:clu_30841	0.00000013	0.36	Adipose - Subcutaneous
							PLTP	45907904:45909942:clu_31248	0.0000022	0.39	Breast - Mammary Tissue
							PLTP	45907904:45909942:clu_31643	0.0000025	0.33	Skin - Sun Exposed (Lower leg)
							PLTP	45907904:45909942:clu_32475	0.000008	0.34	Lung
rs3787268	46013092	rs6073983	46001252	11840	0.89	0.98	PLTP	45907904:45909942:clu_30841	0.00000028	0.35	Adipose - Subcutaneous
							PLTP	45907904:45909942:clu_31248	0.0000025	0.39	Breast - Mammary Tissue
							PLTP	45907904:45909942:clu_31643	0.0000056	0.32	Skin - Sun Exposed (Lower leg)
							PLTP	45907904:45909942:clu_32475	0.00001	0.33	Lung
rs3787268	46013092	rs3761157	46006183	6909	0.98	0.99	PLTP	45907904:45909942:clu_30841	0.00000021	0.36	Adipose - Subcutaneous
							PLTP	45907904:45909942:clu_31248	0.0000011	0.41	Breast - Mammary Tissue
							PLTP	45907904:45909942:clu_31643	0.0000074	0.32	Skin - Sun Exposed (Lower leg)
							PLTP	45907904:45909942:clu_32475	0.000012	0.33	Lung
rs3787268	46013092	rs3918262	46015131	-2039	1	1	PLTP	45907904:45909942:clu_30841	0.00000015	0.36	Adipose - Subcutaneous
							PLTP	45907904:45909942:clu_31248	0.00000056	0.42	Breast - Mammary Tissue
							PLTP	45907904:45909942:clu_31643	0.000011	0.31	Skin - Sun Exposed (Lower leg)
rs3787268	46013092	rs6073989	46022571	-9479	0.95	0.98	PLTP	45907904:45909942:clu_30841	0.00000012	0.37	Adipose - Subcutaneous
							PLTP	45907904:45909942:clu_31248	0.00000014	0.44	Breast - Mammary Tissue
rs3787268	46013092	rs16991010	46023675	-10583	0.95	0.98	PLTP	45907904:45909942:clu_30841	0.00000012	0.37	Adipose - Subcutaneous
							PLTP	45907904:45909942:clu_31248	0.00000039	0.43	Breast - Mammary Tissue
rs3787268	46013092	rs6130998	46024480	-11388	0.95	0.98	PLTP	45907904:45909942:clu_30841	0.00000012	0.37	Adipose - Subcutaneous
							PLTP	45907904:45909942:clu_31248	0.00000039	0.43	Breast - Mammary Tissue
rs3787268	46013092	rs6130999	46026853	-13761	0.95	0.98	PLTP	45907904:45909942:clu_30841	0.00000012	0.37	Adipose - Subcutaneous
							PLTP	45907904:45909942:clu_31248	0.00000039	0.43	Breast - Mammary Tissue
rs3787268	46013092	rs6073991	46027473	-14381	0.95	0.98	PLTP	45907904:45909942:clu_30841	0.00000012	0.37	Adipose - Subcutaneous
							PLTP	45907904:45909942:clu_31248	0.00000039	0.43	Breast - Mammary Tissue
rs3787268	46013092	rs13039389	46031067	-17975	0.91	0.97	PLTP	45907904:45909942:clu_30841	0.00000012	0.37	Adipose - Subcutaneous
							PLTP	45907904:45909942:clu_31248	0.00000014	0.44	Breast - Mammary Tissue
rs3787268	46013092	rs6131001	46032717	-19625	0.94	0.98	PLTP	45907904:45909942:clu_30841	0.00000012	0.37	Adipose - Subcutaneous
							PLTP	45907904:45909942:clu_31248	0.00000014	0.44	Breast - Mammary Tissue
rs2250889	46013767	rs6094239	46024910	-11143	0.92	0.97	SLC12A5	46021886:46023369:clu_29529	0.0000000061	2020-01-01	Pituitary
rs17577	46014472	rs1888235	45995328	19144	0.94	0.98	CD40	46126741:46128138:clu_32508	0.00000000096	0.47	Lung
							CD40	46126741:46128138:clu_32508	0.00000000096	0.47	Lung
							CD40	46126741:46128138:clu_33045	0.0000000038	0.51	Thyroid
							SLC12A5	46021886:46023369:clu_29529	0.000000018	0.78	Pituitary
							CD40	46126741:46128138:clu_27442	0.00000018	0.51	Artery - Aorta
							ACOT8	45841956:45844263:clu_24540	0.00000037	0.61	Heart - Left Ventricle
							CD40	46126741:46128138:clu_22055	0.00000076	0.76	Cells - EBV-transformed lymphocytes
							CD40	46126741:46128138:clu_30875	0.0000012	0.36	Adipose - Subcutaneous
							CD40	46126741:46128138:clu_30057	0.0000017	0.41	Adipose - Visceral (Omentum)
							CD40	46126741:46128138:clu_30057	0.0000017	0.41	Adipose - Visceral (Omentum)
							CD40	46126741:46128138:clu_31855	0.0000035	0.39	Nerve - Tibial
rs17577	46014472	rs6073984	46002014	12458	0.94	0.98	CD40	46126741:46128138:clu_32508	0.00000000096	0.47	Lung
							CD40	46126741:46128138:clu_32508	0.00000000096	0.47	Lung
							CD40	46126741:46128138:clu_33045	0.0000000043	0.51	Thyroid
							SLC12A5	46021886:46023369:clu_29529	0.000000018	0.78	Pituitary
							CD40	46126741:46128138:clu_27442	0.00000018	0.51	Artery - Aorta
							ACOT8	45841956:45844263:clu_24540	0.00000049	0.61	Heart - Left Ventricle
							CD40	46126741:46128138:clu_22055	0.00000076	0.76	Cells - EBV-transformed lymphocytes
							CD40	46126741:46128138:clu_30875	0.0000015	0.35	Adipose - Subcutaneous
							CD40	46126741:46128138:clu_30057	0.0000017	0.41	Adipose - Visceral (Omentum)
							CD40	46126741:46128138:clu_30057	0.0000017	0.41	Adipose - Visceral (Omentum)
							CD40	46126741:46128138:clu_31855	0.0000035	0.39	Nerve - Tibial
rs17577	46014472	rs6065912	46003728	10744	0.84	0.98	CD40	46126741:46128138:clu_32508	0.00000000028	0.52	Lung
							CD40	46126741:46128138:clu_32508	0.00000000028	0.52	Lung
							CD40	46126741:46128138:clu_33045	0.0000000011	0.55	Thyroid
							CD40	46126741:46128138:clu_27442	0.000000011	0.58	Artery - Aorta
							ACOT8	45841956:45844263:clu_24540	0.000000024	0.69	Heart - Left Ventricle
							SLC12A5	46021886:46023369:clu_29529	0.00000004	0.78	Pituitary
							ACOT8	45841956:45844263:clu_27123	0.000000059	0.62	Heart - Atrial Appendage
							CD40	46126741:46128138:clu_22055	0.000000062	0.88	Cells - EBV-transformed lymphocytes
							CD40	46126741:46128138:clu_30057	0.00000046	0.45	Adipose - Visceral (Omentum)
							CD40	46126741:46128138:clu_30057	0.00000046	0.45	Adipose - Visceral (Omentum)
							CD40	46126741:46128138:clu_30875	0.00000062	0.38	Adipose - Subcutaneous
							CD40	46126741:46128138:clu_31855	0.0000007	0.43	Nerve - Tibial
							SLC12A5	46023071:46023369:clu_32502	0.0000045	-0.47	Lung
rs17577	46014472	rs3918241	46007096	7376	0.98	1	CD40	46126741:46128138:clu_33045	0.0000000022	0.51	Thyroid
							CD40	46126741:46128138:clu_32508	0.0000000092	0.44	Lung
							CD40	46126741:46128138:clu_32508	0.0000000092	0.44	Lung
							SLC12A5	46021886:46023369:clu_29529	0.0000000098	0.79	Pituitary
							CD40	46126741:46128138:clu_27442	0.00000049	0.48	Artery - Aorta
							ACOT8	45841956:45844263:clu_24540	0.0000011	0.58	Heart - Left Ventricle
							CD40	46126741:46128138:clu_22055	0.0000015	0.74	Cells - EBV-transformed lymphocytes
							ACOT8	45841956:45844263:clu_27123	0.0000033	0.5	Heart - Atrial Appendage
rs17577	46014472	rs3918242	46007337	7135	0.98	1	CD40	46126741:46128138:clu_33045	0.0000000029	0.5	Thyroid
							CD40	46126741:46128138:clu_32508	0.0000000067	0.45	Lung
							CD40	46126741:46128138:clu_32508	0.0000000067	0.45	Lung
							SLC12A5	46021886:46023369:clu_29529	0.0000000098	0.79	Pituitary
							CD40	46126741:46128138:clu_27442	0.00000041	0.49	Artery - Aorta
							ACOT8	45841956:45844263:clu_24540	0.0000011	0.58	Heart - Left Ventricle
							CD40	46126741:46128138:clu_22055	0.0000015	0.74	Cells - EBV-transformed lymphocytes
							ACOT8	45841956:45844263:clu_27123	0.0000041	0.49	Heart - Atrial Appendage
rs17577	46014472	rs2274755	46011053	3419	0.99	1	SLC12A5	46021886:46023369:clu_29529	0.00000000026	0.86	Pituitary
							CD40	46126741:46128138:clu_32508	0.0000000065	0.45	Lung
							CD40	46126741:46128138:clu_32508	0.0000000065	0.45	Lung
							CD40	46126741:46128138:clu_33045	0.000000015	0.47	Thyroid
							CD40	46126741:46128138:clu_27442	0.0000002	0.5	Artery - Aorta
							ACOT8	45841956:45844263:clu_24540	0.00000066	0.59	Heart - Left Ventricle
							CD40	46126741:46128138:clu_22055	0.00000092	0.76	Cells - EBV-transformed lymphocytes
							SLC12A5	46023071:46023369:clu_25498	0.0000012	-0.43	Brain - Cerebellar Hemisphere
							ACOT8	45841956:45844263:clu_27123	0.0000025	0.49	Heart - Atrial Appendage
rs17577	46014472	rs2236416	46011936	2536	0.99	1	SLC12A5	46021886:46023369:clu_29529	0.0000000058	0.79	Pituitary
							CD40	46126741:46128138:clu_32508	0.0000000067	0.45	Lung
							CD40	46126741:46128138:clu_32508	0.0000000067	0.45	Lung
							CD40	46126741:46128138:clu_33045	0.000000022	0.47	Thyroid
							CD40	46126741:46128138:clu_22055	0.00000046	0.78	Cells - EBV-transformed lymphocytes
							CD40	46126741:46128138:clu_27442	0.00000053	0.49	Artery - Aorta
							ACOT8	45841956:45844263:clu_24540	0.0000015	0.58	Heart - Left Ventricle
							ACOT8	45841956:45844263:clu_27123	0.0000039	0.49	Heart - Atrial Appendage
							SLC12A5	46023071:46023369:clu_32502	0.000018	-0.42	Lung
rs17577	46014472	rs3918261	46014953	-481	1	1	SLC12A5	46021886:46023369:clu_29529	0.00000000011	0.88	Pituitary
							CD40	46126741:46128138:clu_32508	0.000000027	0.42	Lung
							CD40	46126741:46128138:clu_32508	0.000000027	0.42	Lung
							CD40	46126741:46128138:clu_33045	0.000000067	0.45	Thyroid
							CD40	46126741:46128138:clu_27442	0.00000055	0.47	Artery - Aorta
							ACOT8	45841956:45844263:clu_24540	0.00000085	0.58	Heart - Left Ventricle
							SLC12A5	46023071:46023369:clu_25498	0.0000012	-0.43	Brain - Cerebellar Hemisphere
							CD40	46126741:46128138:clu_22055	0.0000023	0.73	Cells - EBV-transformed lymphocytes
							ACOT8	45841956:45844263:clu_27123	0.0000036	0.48	Heart - Atrial Appendage
rs17577	46014472	rs13925	46016326	-1854	1	1	SLC12A5	46021886:46023369:clu_29529	0.000000002	0.82	Pituitary
							CD40	46126741:46128138:clu_32508	0.000000011	0.44	Lung
							CD40	46126741:46128138:clu_32508	0.000000011	0.44	Lung
							CD40	46126741:46128138:clu_33045	0.000000012	0.48	Thyroid
							CD40	46126741:46128138:clu_27442	0.0000004	0.49	Artery - Aorta
							CD40	46126741:46128138:clu_22055	0.00000092	0.76	Cells - EBV-transformed lymphocytes
							ACOT8	45841956:45844263:clu_24540	0.0000012	0.58	Heart - Left Ventricle
							ACOT8	45841956:45844263:clu_27123	0.0000018	0.5	Heart - Atrial Appendage
							SLC12A5	46023071:46023369:clu_32502	0.00002	-0.41	Lung
rs17577	46014472	rs3918270	46016700	-2228	0.98	1	SLC12A5	46021886:46023369:clu_29529	0.00000000026	0.86	Pituitary
							CD40	46126741:46128138:clu_32508	0.000000018	0.43	Lung
							CD40	46126741:46128138:clu_32508	0.000000018	0.43	Lung
							CD40	46126741:46128138:clu_33045	0.000000032	0.46	Thyroid
							CD40	46126741:46128138:clu_27442	0.00000032	0.48	Artery - Aorta
							ACOT8	45841956:45844263:clu_24540	0.0000007	0.58	Heart - Left Ventricle
							CD40	46126741:46128138:clu_22055	0.00000092	0.76	Cells - EBV-transformed lymphocytes
							SLC12A5	46023071:46023369:clu_25498	0.0000012	-0.43	Brain - Cerebellar Hemisphere
							ACOT8	45841956:45844263:clu_27123	0.0000021	0.49	Heart - Atrial Appendage
rs17577	46014472	rs3918271	46016954	-2482	0.95	0.97	SLC12A5	46021886:46023369:clu_29529	0.00000000026	0.86	Pituitary
							CD40	46126741:46128138:clu_32508	0.0000000065	0.45	Lung
							CD40	46126741:46128138:clu_32508	0.0000000065	0.45	Lung
							CD40	46126741:46128138:clu_33045	0.000000032	0.46	Thyroid
							CD40	46126741:46128138:clu_27442	0.00000038	0.49	Artery - Aorta
							ACOT8	45841956:45844263:clu_24540	0.0000007	0.58	Heart - Left Ventricle
							CD40	46126741:46128138:clu_22055	0.00000092	0.76	Cells - EBV-transformed lymphocytes
							SLC12A5	46023071:46023369:clu_25498	0.0000012	-0.43	Brain - Cerebellar Hemisphere
							ACOT8	45841956:45844263:clu_27123	0.0000021	0.49	Heart - Atrial Appendage
rs17577	46014472	rs66553311	46020003	-5531	0.84	1	SLC12A5	46021886:46023369:clu_29529	0.00000000000000011	0.98	Pituitary
							SLC12A5	46021886:46023369:clu_26648	0.00000000000000031	0.99	Brain - Cerebellum
							SLC12A5	46021886:46023369:clu_53353	0.00000000000016	0.74	Testis
							SLC12A5	46023071:46023369:clu_25498	0.00000000000045	-0.57	Brain - Cerebellar Hemisphere
							SLC12A5	46023071:46023369:clu_24852	0.0000000017	-0.69	Brain - Cortex
							SLC12A5	46021886:46023369:clu_30051	0.00000097	0.43	Adipose - Visceral (Omentum)
							CD40	46126741:46128138:clu_33045	0.0000013	0.36	Thyroid
							SLC35C2	46357702:46358387:clu_26669	0.0000024	0.61	Brain - Cerebellum
							ACOT8	45841956:45844263:clu_24540	0.000003	0.48	Heart - Left Ventricle
rs17577	46014472	rs10432735	46021679	-7207	0.91	0.98	SLC12A5	46021886:46023369:clu_29529	0.00000000026	0.86	Pituitary
							CD40	46126741:46128138:clu_32508	0.0000000065	0.45	Lung
							CD40	46126741:46128138:clu_32508	0.0000000065	0.45	Lung
							CD40	46126741:46128138:clu_33045	0.000000032	0.46	Thyroid
							CD40	46126741:46128138:clu_27442	0.00000038	0.49	Artery - Aorta
							ACOT8	45841956:45844263:clu_24540	0.0000007	0.58	Heart - Left Ventricle
							CD40	46126741:46128138:clu_22055	0.00000092	0.76	Cells - EBV-transformed lymphocytes
							SLC12A5	46023071:46023369:clu_25498	0.0000012	-0.43	Brain - Cerebellar Hemisphere
							ACOT8	45841956:45844263:clu_27123	0.0000021	0.49	Heart - Atrial Appendage
